# Supplementary material for: Radiotherapy after mastectomy has significant survival benefits for inflammatory breast cancer: a SEER population-based retrospective study
Source: PeerJ. 2020 Feb 3;8:e8512. doi: 10.7717/peerj.8512 (PMC7003697; doi:10.7717/peerj.8512)
Supplement: File S2 [file peerj-08-8512-s002.xlsx]

## Sheet: Sheet1
Patient ID	Marital status at diagnosis	Age at diagnosis	Race recode (White, Black, Other)	Primary Site - labeled	Grade	Laterality	Derived AJCC Stage Group, 7th ed (2010+)	Derived AJCC Stage Group, 6th ed (2004+)	AJCC stage 3rd edition (1988-2003)	SEER modified AJCC stage 3rd (1988-2003)	Derived AJCC T, 7th ed (2010+)	Derived AJCC N, 7th ed (2010+)	Derived AJCC M, 7th ed (2010+)	Derived AJCC T, 6th ed (2004+)	Derived AJCC N, 6th ed (2004+)	Derived AJCC M, 6th ed (2004+)	Derived SS1977 (2004+)	Derived SS2000 (2004+)	Summary stage 2000 (1998+)	RX Summ--Surg Prim Site (1998+)	RX Summ--Scope Reg LN Sur (2003+)	RX Summ--Surg Oth Reg/Dis (2003+)	Reason no cancer-directed surgery	CS tumor size (2004+)	CS extension (2004+)	CS lymph nodes (2004+)	CS mets at dx (2004+)	CS site-specific factor 1 (2004+ varying by schema)	CS site-specific factor 2 (2004+ varying by schema)	CS site-specific factor 3 (2004+ varying by schema)	CS site-specific factor 4 (2004+ varying by schema)	CS site-specific factor 5 (2004+ varying by schema)	CS site-specific factor 6 (2004+ varying by schema)	CS site-specific factor 7 (2004+ varying by schema)	CS site-specific factor 15 (2004+ varying by schema)	CS site-specific factor 16 (2004+ varying by schema)	CS site-specific factor 25 (2004+ varying by schema)	CS Tumor Size/Ext Eval (2004+)	CS Reg Node Eval (2004+)	CS Mets Eval (2004+)	Regional nodes examined (1988+)	Regional nodes positive (1988+)	Lymph-vascular Invasion (2004+ varying by schema)	CS mets at DX-bone (2010+)	CS mets at DX-brain (2010+)	CS mets at DX-liver (2010+)	CS mets at DX-lung (2010+)	COD to site recode	SEER cause-specific death classification
51979045	Widowed	92	White	C50.9-Breast, NOS	Poorly differentiated; Grade III	Right - origin of primary	IIIB	IIIB	Blank(s)	Blank(s)	T4d	N1a	M0	T4d	N1a	M0	RE+RN	RE+RN	Regional	40	Unknown or not applicable	None; diagnosed at autopsy	Surgery performed	45	750	250	0	20	20	3	987	987	20	80	20	Blank(s)	988	5	6	0	3	3	Blank(s)	No	No	No	No	Breast	Dead (attributable to this cancer dx)
69957560	Single (never married)	91	White	C50.1-Central portion of breast	Moderately differentiated; Grade II	Right - origin of primary	IIIB	UNK Stage	Blank(s)	Blank(s)	T4d	N1	M0	T4d	N1	MX	RE+RN	RE+RN	Regional	41	Unknown or not applicable	None; diagnosed at autopsy	Surgery performed	70	750	600	99	20	20	98	987	987	0	60	20	Blank(s)	988	3	0	9	0	98	Blank(s)	Unknown	Unknown	Unknown	Unknown	Alzheimers (ICD-9 and 10 only)	Alive or dead of other cause
70208697	Widowed	91	White	C50.9-Breast, NOS	Moderately differentiated; Grade II	Right - origin of primary	IIIB	IIIB	Blank(s)	Blank(s)	T4d	N0	M0	T4d	N0	M0	RE	RE	Regional	41	Unknown or not applicable	None; diagnosed at autopsy	Surgery performed	120	750	0	0	10	10	0	0	0	0	60	20	Blank(s)	988	3	3	0	12	0	Blank(s)	No	No	No	No	Alive	Alive or dead of other cause
70043537	Married (including common law)	90	White	C50.5-Lower-outer quadrant of breast	Poorly differentiated; Grade III	Right - origin of primary	IIIC	IIIC	Blank(s)	Blank(s)	T4d	N3NOS	M0	T4d	N3NOS	M0	RE+RN	RE+RN	Regional	51	Unknown or not applicable	None; diagnosed at autopsy	Surgery performed	22	750	820	0	10	10	13	987	987	0	90	20	Blank(s)	988	3	3	0	15	13	Blank(s)	No	No	No	No	Alive	Alive or dead of other cause
12877469	Married (including common law)	88	White	C50.9-Breast, NOS	Poorly differentiated; Grade III	Right - origin of primary	IIIB	IIIB	Blank(s)	Blank(s)	T4d	N1a	M0	T4d	N1a	M0	RE+RN	RE+RN	Regional	52	Unknown or not applicable	None; diagnosed at autopsy	Surgery performed	78	750	600	0	10	10	1	987	987	20	80	10	Blank(s)	988	3	3	0	4	2	Blank(s)	No	No	No	No	Alive	Alive or dead of other cause
38136072	Married (including common law)	86	White	C50.9-Breast, NOS	Moderately differentiated; Grade II	Left - origin of primary	IIIC	IIIC	Blank(s)	Blank(s)	T4d	N3b	M0	T4d	N3b	M0	RE+RN	RE+RN	Regional	51	Unknown or not applicable	None; diagnosed at autopsy	Surgery performed	998	750	763	0	10	10	10	987	987	0	60	20	Blank(s)	988	3	3	0	11	10	Blank(s)	No	No	No	No	Alive	Alive or dead of other cause
44215833	Single (never married)	88	White	C50.8-Overlapping lesion of breast	Unknown	Left - origin of primary	IIIB	IIIB	Blank(s)	Blank(s)	T4d	N0	M0	T4d	N0	M0	RE	RE	Regional	51	Unknown or not applicable	None; diagnosed at autopsy	Surgery performed	9	750	0	0	20	20	0	0	0	20	999	20	Blank(s)	988	0	5	0	20	0	Blank(s)	No	No	No	No	Alive	Alive or dead of other cause
80203779	Widowed	82	Black	C50.9-Breast, NOS	Poorly differentiated; Grade III	Right - origin of primary	IIIB	IIIB	Blank(s)	Blank(s)	T4d	N0	M0	T4d	N0	M0	RE	RE	Regional	41	Unknown or not applicable	None; diagnosed at autopsy	Surgery performed	10	750	0	0	20	20	98	0	0	0	999	10	Blank(s)	988	3	3	0	4	0	Blank(s)	No	No	No	No	Alive	Alive or dead of other cause
98215678	Married (including common law)	81	White	C50.8-Overlapping lesion of breast	Poorly differentiated; Grade III	Left - origin of primary	IIIB	IIIB	Blank(s)	Blank(s)	T4d	N0(i+)	M0	T4d	N0(i+)	M0	RE	RE	Regional	51	Unknown or not applicable	None; diagnosed at autopsy	Surgery performed	28	730	50	0	20	20	0	987	987	0	998	20	Blank(s)	988	6	3	0	13	0	Blank(s)	No	No	No	No	Alive	Alive or dead of other cause
98114617	Widowed	79	White	C50.0-Nipple	Poorly differentiated; Grade III	Right - origin of primary	IIIB	IIIB	Blank(s)	Blank(s)	T4d	N0	M0	T4d	N0	M0	RE	RE	Regional	51	Unknown or not applicable	None; diagnosed at autopsy	Surgery performed	50	750	0	0	10	10	0	0	0	0	30	20	Blank(s)	988	3	3	0	19	0	Blank(s)	No	No	No	No	Septicemia	Alive or dead of other cause
27132918	Widowed	82	White	C50.1-Central portion of breast	Poorly differentiated; Grade III	Left - origin of primary	IIIB	IIIB	Blank(s)	Blank(s)	T4d	N0	M0	T4d	N0	M0	RE	RE	Regional	41	Unknown or not applicable	None; diagnosed at autopsy	Surgery performed	26	750	0	0	10	10	98	0	0	0	80	20	Blank(s)	988	3	0	0	0	98	Blank(s)	No	No	No	No	Alive	Alive or dead of other cause
6143441	Unknown	80	White	C50.8-Overlapping lesion of breast	Undifferentiated; anaplastic; Grade IV	Left - origin of primary	IV	IV	Blank(s)	Blank(s)	T4d	N2a	M1	T4d	N2a	M1	D	D	Distant	51	Unknown or not applicable	None; diagnosed at autopsy	Surgery performed	998	750	510	44	10	20	7	987	987	0	90	20	Blank(s)	988	5	5	0	7	7	Blank(s)	Yes	No	No	No	Breast	Dead (attributable to this cancer dx)
77050396	Widowed	80	White	C50.8-Overlapping lesion of breast	Poorly differentiated; Grade III	Left - origin of primary	IIIB	IIIB	Blank(s)	Blank(s)	T4d	N0	M0	T4d	N0	M0	RE	RE	Regional	41	Unknown or not applicable	None; diagnosed at autopsy	Surgery performed	40	750	0	0	10	20	0	0	0	0	90	20	Blank(s)	988	3	3	0	6	0	Blank(s)	No	No	No	No	Stomach and Duodenal Ulcers	Alive or dead of other cause
98144092	Widowed	78	White	C50.2-Upper-inner quadrant of breast	Poorly differentiated; Grade III	Left - origin of primary	IIIB	IIIB	Blank(s)	Blank(s)	T4d	N1a	M0	T4d	N1a	M0	RE+RN	RE+RN	Regional	51	Unknown or not applicable	None; diagnosed at autopsy	Surgery performed	65	750	250	0	10	10	1	987	987	20	90	30	Blank(s)	988	3	3	0	14	1	Blank(s)	No	No	No	No	Alive	Alive or dead of other cause
12889011	Widowed	78	Black	C50.1-Central portion of breast	Moderately differentiated; Grade II	Left - origin of primary	IIIB	IIIB	Blank(s)	Blank(s)	T4d	N1	M0	T4d	N1	M0	RE+RN	RE+RN	Regional	41	Unknown or not applicable	None; diagnosed at autopsy	Surgery performed	120	750	260	0	10	10	98	987	987	20	60	10	Blank(s)	988	6	0	0	0	98	Blank(s)	No	No	No	No	Alive	Alive or dead of other cause
98169730	Widowed	77	White	C50.8-Overlapping lesion of breast	Unknown	Right - origin of primary	IIIC	IIIC	Blank(s)	Blank(s)	T4d	N3a	M0	T4d	N3a	M0	D	RE+RN	Regional	41	Unknown or not applicable	None; diagnosed at autopsy	Surgery performed	35	750	755	0	20	20	18	987	987	0	80	20	Blank(s)	988	5	6	0	20	18	Blank(s)	No	No	No	No	Breast	Dead (attributable to this cancer dx)
27136939	Widowed	77	White	C50.9-Breast, NOS	Unknown	Left - origin of primary	IIIB	IIIB	Blank(s)	Blank(s)	T4d	N1	M0	T4d	N1	M0	RE+RN	RE+RN	Regional	51	Unknown or not applicable	None; diagnosed at autopsy	Surgery performed	998	750	255	0	10	10	0	987	987	987	999	20	Blank(s)	988	5	5	0	12	0	Blank(s)	No	No	No	No	Alive	Alive or dead of other cause
77133552	Married (including common law)	79	White	C50.4-Upper-outer quadrant of breast	Poorly differentiated; Grade III	Left - origin of primary	IIIB	IIIB	Blank(s)	Blank(s)	T4d	N1	M0	T4d	N1	M0	RE+RN	RE+RN	Regional	51	Unknown or not applicable	None; diagnosed at autopsy	Surgery performed	65	730	255	0	10	20	2	987	987	0	999	20	Blank(s)	988	5	5	0	2	2	Blank(s)	No	No	No	No	Breast	Dead (attributable to this cancer dx)
12920048	Married (including common law)	76	White	C50.9-Breast, NOS	Moderately differentiated; Grade II	Left - origin of primary	IIIB	IIIB	Blank(s)	Blank(s)	T4d	N1	M0	T4d	N1	M0	RE+RN	RE+RN	Regional	51	Unknown or not applicable	Non-primary surgical procedure to other regional sites	Surgery performed	999	750	255	0	20	20	7	987	987	987	999	20	Blank(s)	988	5	5	0	10	7	Blank(s)	No	No	No	No	Breast	Dead (attributable to this cancer dx)
70237303	Unknown	77	White	C50.9-Breast, NOS	Poorly differentiated; Grade III	Left - origin of primary	IV	IV	Blank(s)	Blank(s)	T4d	N3a	M1	T4d	N3a	M1	D	D	Distant	50	Unknown or not applicable	None; diagnosed at autopsy	Surgery performed	164	750	750	40	10	20	23	987	987	20	80	20	Blank(s)	988	3	3	1	35	24	Blank(s)	Yes	No	No	No	Breast	Dead (attributable to this cancer dx)
22133720	Divorced	75	Other (American Indian/AK Native, Asian/Pacific Islander)	C50.8-Overlapping lesion of breast	Moderately differentiated; Grade II	Left - origin of primary	IIIB	IIIB	Blank(s)	Blank(s)	T4d	N1a	M0	T4d	N1a	M0	RE+RN	RE+RN	Regional	51	Unknown or not applicable	None; diagnosed at autopsy	Surgery performed	55	725	250	0	10	10	2	987	987	20	60	20	Blank(s)	988	5	6	0	10	2	Blank(s)	No	No	No	No	Alive	Alive or dead of other cause
42514839	Married (including common law)	74	Other (American Indian/AK Native, Asian/Pacific Islander)	C50.4-Upper-outer quadrant of breast	Moderately differentiated; Grade II	Right - origin of primary	IIIB	IIIB	Blank(s)	Blank(s)	T4d	N2a	M0	T4d	N2a	M0	RE+RN	RE+RN	Regional	41	Unknown or not applicable	None; diagnosed at autopsy	Surgery performed	35	750	250	0	10	10	8	987	987	0	60	20	Blank(s)	988	3	3	0	8	8	Blank(s)	No	No	No	No	Alive	Alive or dead of other cause
80217335	Single (never married)	74	Black	C50.8-Overlapping lesion of breast	Poorly differentiated; Grade III	Left - origin of primary	IV	IV	Blank(s)	Blank(s)	T4d	N3a	M1	T4d	N3a	M1	D	D	Distant	51	Unknown or not applicable	None; diagnosed at autopsy	Surgery performed	110	750	520	44	10	20	10	987	987	50	130	20	Blank(s)	988	5	6	0	10	10	Blank(s)	No	No	No	Yes	Breast	Dead (attributable to this cancer dx)
98172217	Divorced	74	Black	C50.8-Overlapping lesion of breast	Unknown	Left - origin of primary	IIIB	IIIB	Blank(s)	Blank(s)	T4d	N2a	M0	T4d	N2a	M0	RE+RN	RE+RN	Regional	61	Unknown or not applicable	None; diagnosed at autopsy	Surgery performed	48	750	250	0	20	20	6	987	987	987	90	10	Blank(s)	988	5	6	0	10	6	Blank(s)	No	No	No	No	Breast	Dead (attributable to this cancer dx)
52038953	Widowed	74	White	C50.9-Breast, NOS	Poorly differentiated; Grade III	Left - origin of primary	IV	IV	Blank(s)	Blank(s)	T4d	NX	M1	T4d	NX	M1	D	D	Distant	80	Unknown or not applicable	None; diagnosed at autopsy	Surgery performed	998	750	999	44	20	20	99	987	987	0	90	10	Blank(s)	988	3	9	0	99	99	Blank(s)	Yes	Unknown	Unknown	Unknown	Breast	Dead (attributable to this cancer dx)
70208494	Divorced	74	White	C50.9-Breast, NOS	Poorly differentiated; Grade III	Right - origin of primary	IIIB	IIIB	Blank(s)	Blank(s)	T4d	N1a	M0	T4d	N1a	M0	RE+RN	RE+RN	Regional	41	Unknown or not applicable	None; diagnosed at autopsy	Surgery performed	21	750	250	0	10	10	3	987	987	30	90	20	Blank(s)	988	3	3	0	10	3	Blank(s)	No	No	No	No	Alive	Alive or dead of other cause
35217800	Married (including common law)	72	White	C50.9-Breast, NOS	Poorly differentiated; Grade III	Right - origin of primary	IV	IV	Blank(s)	Blank(s)	T4d	N1	M1	T4d	N1	M1	D	D	Distant	41	Unknown or not applicable	None; diagnosed at autopsy	Surgery performed	23	750	600	44	10	10	98	987	987	0	90	10	Blank(s)	988	6	0	0	0	98	Blank(s)	Unknown	Unknown	Unknown	Yes	Breast	Dead (attributable to this cancer dx)
71435457	Divorced	74	White	C50.8-Overlapping lesion of breast	Moderately differentiated; Grade II	Left - origin of primary	IIIB	IIIB	Blank(s)	Blank(s)	T4d	N1	M0	T4d	N1	M0	RE+RN	RE+RN	Regional	52	Unknown or not applicable	None; diagnosed at autopsy	Surgery performed	44	730	257	0	10	10	98	987	987	0	60	20	Blank(s)	988	1	0	0	0	98	Blank(s)	No	No	No	No	Alive	Alive or dead of other cause
71489636	Widowed	74	White	C50.4-Upper-outer quadrant of breast	Moderately differentiated; Grade II	Left - origin of primary	IV	IV	Blank(s)	Blank(s)	T4d	N2a	M1	T4d	N2a	M1	D	D	Distant	51	Unknown or not applicable	None; diagnosed at autopsy	Surgery performed	30	725	250	44	10	10	8	987	987	987	998	20	Blank(s)	988	3	3	0	8	8	Blank(s)	Yes	No	No	No	Alive	Alive or dead of other cause
76219884	Widowed	71	White	C50.9-Breast, NOS	Moderately differentiated; Grade II	Left - origin of primary	IIIC	IIIC	Blank(s)	Blank(s)	T4d	N3c	M0	T4d	N3c	M0	D	D	Distant	51	Unknown or not applicable	None; diagnosed at autopsy	Surgery performed	998	730	800	0	20	20	98	987	987	0	70	20	Blank(s)	988	5	0	0	0	98	Blank(s)	No	No	No	No	Breast	Dead (attributable to this cancer dx)
44221755	Widowed	74	White	C50.9-Breast, NOS	Unknown	Right - origin of primary	IIIB	IIIB	Blank(s)	Blank(s)	T4d	N1a	M0	T4d	N1a	M0	RE+RN	RE+RN	Regional	51	Unknown or not applicable	None; diagnosed at autopsy	Surgery performed	70	750	250	0	10	20	3	987	987	0	80	20	Blank(s)	988	5	6	0	6	3	Blank(s)	No	No	No	No	Alive	Alive or dead of other cause
76207320	Married (including common law)	70	White	C50.5-Lower-outer quadrant of breast	Moderately differentiated; Grade II	Left - origin of primary	IIIB	IIIB	Blank(s)	Blank(s)	T4d	N0	M0	T4d	N0	M0	RE	RE	Regional	51	Unknown or not applicable	None; diagnosed at autopsy	Surgery performed	999	750	0	0	10	10	98	0	0	60	60	988	Blank(s)	988	3	0	0	0	98	Blank(s)	No	No	No	No	Alive	Alive or dead of other cause
71524444	Widowed	72	White	C50.9-Breast, NOS	Well differentiated; Grade I	Left - origin of primary	IIIC	IIIC	Blank(s)	Blank(s)	T4d	N3a	M0	T4d	N3a	M0	D	RE+RN	Regional	52	Unknown or not applicable	None; diagnosed at autopsy	Surgery performed	999	750	755	0	10	10	16	987	987	60	50	20	Blank(s)	988	6	6	0	20	16	Blank(s)	No	No	No	No	Alive	Alive or dead of other cause
53149246	Married (including common law)	72	White	C50.9-Breast, NOS	Unknown	Left - origin of primary	IIIC	IIIC	Blank(s)	Blank(s)	T4d	N3a	M0	T4d	N3a	M0	RE+RN	RE+RN	Regional	51	Unknown or not applicable	None; diagnosed at autopsy	Surgery performed	999	750	250	0	10	10	14	987	987	0	80	20	Blank(s)	988	5	6	0	14	14	Blank(s)	No	No	No	No	Alive	Alive or dead of other cause
77094071	Married (including common law)	71	White	C50.9-Breast, NOS	Moderately differentiated; Grade II	Right - origin of primary	IIIB	IIIB	Blank(s)	Blank(s)	T4d	N1a	M0	T4d	N1a	M0	RE+RN	RE+RN	Regional	42	Unknown or not applicable	None; diagnosed at autopsy	Surgery performed	80	750	250	0	10	10	1	987	987	0	60	20	Blank(s)	988	6	6	0	11	1	Blank(s)	No	No	No	No	Alive	Alive or dead of other cause
93777019	Married (including common law)	68	Other (American Indian/AK Native, Asian/Pacific Islander)	C50.9-Breast, NOS	Poorly differentiated; Grade III	Left - origin of primary	IV	IV	Blank(s)	Blank(s)	T4d	N1a	M1	T4d	N1a	M1	D	D	Distant	50	Unknown or not applicable	None; diagnosed at autopsy	Surgery performed	60	750	260	50	10	20	3	987	987	0	80	20	Blank(s)	988	3	3	0	10	3	Blank(s)	No	No	Yes	No	Breast	Dead (attributable to this cancer dx)
12920658	Single (never married)	68	White	C50.8-Overlapping lesion of breast	Poorly differentiated; Grade III	Left - origin of primary	IIIB	IIIB	Blank(s)	Blank(s)	T4d	N1	M0	T4d	N1	M0	RE+RN	RE+RN	Regional	52	Unknown or not applicable	Non-primary surgical procedure to other regional sites	Surgery performed	999	750	255	0	20	30	0	987	987	987	130	10	Blank(s)	988	5	5	0	21	0	Blank(s)	No	No	No	No	Alive	Alive or dead of other cause
71525904	Married (including common law)	71	White	C50.4-Upper-outer quadrant of breast	Unknown	Right - origin of primary	IV	IV	Blank(s)	Blank(s)	T4d	N0	M1	T4d	N0	M1	D	D	Distant	41	Unknown or not applicable	None; diagnosed at autopsy	Surgery performed	998	730	0	44	999	999	98	0	0	0	999	999	Blank(s)	988	5	0	0	0	98	Blank(s)	Unknown	Unknown	Unknown	Yes	Alive	Alive or dead of other cause
99032281	Married (including common law)	70	Black	C50.9-Breast, NOS	Poorly differentiated; Grade III	Left - origin of primary	IIIC	IIIC	Blank(s)	Blank(s)	T4d	N3b	M0	T4d	N3b	M0	D	RE+RN	Regional	51	Unknown or not applicable	None; diagnosed at autopsy	Surgery performed	45	750	765	0	20	20	17	987	987	987	130	20	Blank(s)	988	5	5	0	17	17	Blank(s)	No	No	No	No	Alive	Alive or dead of other cause
71542830	Married (including common law)	71	White	C50.8-Overlapping lesion of breast	Poorly differentiated; Grade III	Right - origin of primary	IIIB	IIIB	Blank(s)	Blank(s)	T4d	N1	M0	T4d	N1	M0	RE+RN	RE+RN	Regional	52	Unknown or not applicable	None; diagnosed at autopsy	Surgery performed	998	750	255	0	10	10	4	987	987	40	80	20	Blank(s)	988	5	5	0	7	4	Blank(s)	No	No	No	No	Alive	Alive or dead of other cause
71499175	Married (including common law)	70	Other (American Indian/AK Native, Asian/Pacific Islander)	C50.4-Upper-outer quadrant of breast	Moderately differentiated; Grade II	Left - origin of primary	IIIB	IIIB	Blank(s)	Blank(s)	T4d	N1a	M0	T4d	N1a	M0	RE+RN	RE+RN	Regional	41	Unknown or not applicable	None; diagnosed at autopsy	Surgery performed	36	750	250	0	10	10	2	987	987	0	70	20	Blank(s)	988	3	3	0	7	2	Blank(s)	No	No	No	No	Alive	Alive or dead of other cause
12992251	Married (including common law)	69	White	C50.8-Overlapping lesion of breast	Moderately differentiated; Grade II	Right - origin of primary	IIIB	IIIB	Blank(s)	Blank(s)	T4d	N2NOS	M0	T4d	N2NOS	M0	RE+RN	RE+RN	Regional	51	Unknown or not applicable	None; diagnosed at autopsy	Surgery performed	85	750	610	0	10	10	5	987	987	0	120	20	Blank(s)	988	5	5	0	6	5	Blank(s)	No	No	No	No	Breast	Dead (attributable to this cancer dx)
70197763	Married (including common law)	68	White	C50.8-Overlapping lesion of breast	Poorly differentiated; Grade III	Right - origin of primary	IV	IV	Blank(s)	Blank(s)	T4d	N1	M1	T4d	N1	M1	D	D	Distant	41	Unknown or not applicable	None; diagnosed at autopsy	Surgery performed	80	750	255	40	20	20	0	987	987	0	80	10	Blank(s)	988	5	5	0	1	0	Blank(s)	No	No	Yes	No	Alive	Alive or dead of other cause
27081124	Married (including common law)	67	White	C50.4-Upper-outer quadrant of breast	Moderately differentiated; Grade II	Right - origin of primary	IIIC	IIIC	Blank(s)	Blank(s)	T4d	N3a	M0	T4d	N3a	M0	D	RE+RN	Regional	51	Unknown or not applicable	None; diagnosed at autopsy	Surgery performed	56	750	750	0	20	20	11	987	987	0	60	988	Blank(s)	988	3	3	0	13	11	Blank(s)	No	No	No	No	Alive	Alive or dead of other cause
36040704	Divorced	68	White	C50.9-Breast, NOS	Poorly differentiated; Grade III	Right - origin of primary	IIIB	IIIB	Blank(s)	Blank(s)	T4d	N2a	M0	T4d	N2a	M0	RE+RN	RE+RN	Regional	51	Unknown or not applicable	None; diagnosed at autopsy	Surgery performed	89	750	250	0	20	20	4	987	987	987	80	20	Blank(s)	988	5	6	0	16	4	Blank(s)	No	No	No	No	Breast	Dead (attributable to this cancer dx)
70173284	Married (including common law)	68	White	C50.1-Central portion of breast	Poorly differentiated; Grade III	Left - origin of primary	IIIB	IIIB	Blank(s)	Blank(s)	T4d	N1	M0	T4d	N1	M0	RE+RN	RE+RN	Regional	51	Unknown or not applicable	None; diagnosed at autopsy	Surgery performed	25	750	255	0	10	20	3	987	987	50	80	20	Blank(s)	988	5	5	0	4	3	Blank(s)	No	No	No	No	Alive	Alive or dead of other cause
77047664	Widowed	67	White	C50.8-Overlapping lesion of breast	Undifferentiated; anaplastic; Grade IV	Left - origin of primary	IV	IV	Blank(s)	Blank(s)	T4d	N2a	M1	T4d	N2a	M1	D	D	Distant	41	Unknown or not applicable	None; diagnosed at autopsy	Surgery performed	15	725	520	44	10	10	4	987	987	20	120	10	Blank(s)	988	6	6	0	4	4	Blank(s)	No	No	No	Yes	Breast	Dead (attributable to this cancer dx)
12945590	Married (including common law)	67	White	C50.4-Upper-outer quadrant of breast	Moderately differentiated; Grade II	Right - origin of primary	IIIB	IIIB	Blank(s)	Blank(s)	T4d	N0(i+)	M0	T4d	N0(i+)	M0	RE	RE	Regional	54	Unknown or not applicable	None; diagnosed at autopsy	Surgery performed	78	750	0	0	20	20	0	9	0	20	60	20	Blank(s)	988	1	6	0	17	0	Blank(s)	No	No	No	No	Breast	Dead (attributable to this cancer dx)
27145902	Divorced	66	White	C50.4-Upper-outer quadrant of breast	Unknown	Left - origin of primary	IIIB	IIIB	Blank(s)	Blank(s)	T4d	N2a	M0	T4d	N2a	M0	RE+RN	RE+RN	Regional	51	Unknown or not applicable	None; diagnosed at autopsy	Surgery performed	999	750	520	0	20	20	8	987	987	60	90	20	Blank(s)	988	5	6	0	8	8	Blank(s)	No	No	No	No	Breast	Dead (attributable to this cancer dx)
99084453	Married (including common law)	67	White	C50.4-Upper-outer quadrant of breast	Poorly differentiated; Grade III	Right - origin of primary	IIIB	IIIB	Blank(s)	Blank(s)	T4d	N1	M0	T4d	N1	M0	RE+RN	RE+RN	Regional	51	Unknown or not applicable	None; diagnosed at autopsy	Surgery performed	17	750	255	0	20	20	0	987	987	20	80	10	Blank(s)	988	3	5	0	9	0	Blank(s)	No	No	No	No	Alive	Alive or dead of other cause
71422539	Widowed	67	White	C50.4-Upper-outer quadrant of breast	Unknown	Left - origin of primary	IIIB	IIIB	Blank(s)	Blank(s)	T4d	N1	M0	T4d	N1	M0	RE+RN	RE+RN	Regional	52	Unknown or not applicable	None; diagnosed at autopsy	Surgery performed	107	750	255	0	20	20	7	987	987	0	80	20	Blank(s)	988	5	0	0	9	7	Blank(s)	No	No	No	No	Alive	Alive or dead of other cause
51982803	Single (never married)	65	White	C50.8-Overlapping lesion of breast	Poorly differentiated; Grade III	Left - origin of primary	IIIB	IIIB	Blank(s)	Blank(s)	T4d	N2a	M0	T4d	N2a	M0	RE+RN	RE+RN	Regional	51	Unknown or not applicable	None; diagnosed at autopsy	Surgery performed	84	750	600	0	10	20	7	987	987	0	999	20	Blank(s)	988	6	6	0	7	7	Blank(s)	No	No	No	No	Breast	Dead (attributable to this cancer dx)
19977516	Married (including common law)	66	White	C50.8-Overlapping lesion of breast	Moderately differentiated; Grade II	Right - origin of primary	IIIB	IIIB	Blank(s)	Blank(s)	T4d	N0	M0	T4d	N0	M0	RE	RE	Regional	51	Unknown or not applicable	None; diagnosed at autopsy	Surgery performed	999	750	0	0	10	10	98	0	0	60	120	20	Blank(s)	988	0	0	0	0	98	Blank(s)	No	No	No	No	Alive	Alive or dead of other cause
70190936	Single (never married)	65	Black	C50.8-Overlapping lesion of breast	Moderately differentiated; Grade II	Right - origin of primary	IIIB	IIIB	Blank(s)	Blank(s)	T4d	N1	M0	T4d	N1	M0	RE+RN	RE+RN	Regional	51	Unknown or not applicable	None; diagnosed at autopsy	Surgery performed	80	750	255	0	10	10	18	987	987	50	60	20	Blank(s)	988	5	5	0	18	18	Blank(s)	No	No	No	No	Alive	Alive or dead of other cause
38181251	Married (including common law)	64	Black	C50.9-Breast, NOS	Unknown	Left - origin of primary	IV	IV	Blank(s)	Blank(s)	T4d	NX	M1	T4d	NX	M1	D	D	Distant	42	Unknown or not applicable	None; diagnosed at autopsy	Surgery performed	999	750	999	44	10	10	99	987	987	987	999	999	Blank(s)	988	3	9	0	99	99	Blank(s)	Yes	No	No	No	Breast	Dead (attributable to this cancer dx)
5400267	Married (including common law)	63	White	C50.9-Breast, NOS	Poorly differentiated; Grade III	Right - origin of primary	IIIC	IIIC	Blank(s)	Blank(s)	T4d	N3a	M0	T4d	N3a	M0	RE+RN	RE+RN	Regional	51	Unknown or not applicable	None; diagnosed at autopsy	Surgery performed	120	730	250	0	10	10	10	987	987	20	90	10	Blank(s)	988	0	3	0	15	10	Blank(s)	No	No	No	No	Diabetes Mellitus	Alive or dead of other cause
77032926	Widowed	65	White	C50.4-Upper-outer quadrant of breast	Moderately differentiated; Grade II	Right - origin of primary	IIIB	IIIB	Blank(s)	Blank(s)	T4d	N1	M0	T4d	N1	M0	RE+RN	RE+RN	Regional	51	Unknown or not applicable	None; diagnosed at autopsy	Surgery performed	34	750	255	0	20	20	2	987	987	0	60	20	Blank(s)	988	5	5	0	6	2	Blank(s)	No	No	No	No	Breast	Dead (attributable to this cancer dx)
77025100	Divorced	64	White	C50.1-Central portion of breast	Poorly differentiated; Grade III	Left - origin of primary	IIIB	IIIB	Blank(s)	Blank(s)	T4d	N2a	M0	T4d	N2a	M0	RE+RN	RE+RN	Regional	50	Unknown or not applicable	None; diagnosed at autopsy	Surgery performed	90	730	250	0	20	20	9	987	987	20	90	10	Blank(s)	988	6	6	0	14	9	Blank(s)	No	No	No	No	Breast	Dead (attributable to this cancer dx)
77074442	Divorced	66	White	C50.8-Overlapping lesion of breast	Poorly differentiated; Grade III	Left - origin of primary	IV	IV	Blank(s)	Blank(s)	T4d	N2a	M1	T4d	N2a	M1	D	D	Distant	51	Unknown or not applicable	None; diagnosed at autopsy	Surgery performed	60	750	510	44	20	20	98	987	987	0	90	20	Blank(s)	988	5	5	0	5	0	Blank(s)	Yes	No	No	Yes	Breast	Dead (attributable to this cancer dx)
80209993	Married (including common law)	63	White	C50.8-Overlapping lesion of breast	Poorly differentiated; Grade III	Right - origin of primary	IIIB	IIIB	Blank(s)	Blank(s)	T4d	N1NOS	M0	T4d	N1NOS	M0	RE+RN	RE+RN	Regional	41	Unknown or not applicable	None; diagnosed at autopsy	Surgery performed	45	750	260	0	10	10	98	987	987	0	80	20	Blank(s)	988	5	6	0	95	95	Blank(s)	No	No	No	No	Breast	Dead (attributable to this cancer dx)
98194948	Widowed	65	White	C50.9-Breast, NOS	Unknown	Left - origin of primary	IIIC	IIIC	Blank(s)	Blank(s)	T4d	N3a	M0	T4d	N3a	M0	D	RE+RN	Regional	52	Unknown or not applicable	Non-primary surgical procedure to other regional sites	Surgery performed	998	750	755	0	10	10	11	987	987	0	130	20	Blank(s)	988	6	6	0	16	11	Blank(s)	No	No	No	No	Alive	Alive or dead of other cause
44183904	Married (including common law)	65	White	C50.4-Upper-outer quadrant of breast	Moderately differentiated; Grade II	Right - origin of primary	IIIC	IIIC	Blank(s)	Blank(s)	T4d	N3b	M0	T4d	N3b	M0	RE+RN	RE+RN	Regional	50	Unknown or not applicable	None; diagnosed at autopsy	Surgery performed	10	725	763	0	10	10	6	987	987	0	999	20	Blank(s)	988	6	6	0	7	6	Blank(s)	No	No	No	No	Alive	Alive or dead of other cause
36098258	Married (including common law)	65	White	C50.8-Overlapping lesion of breast	Poorly differentiated; Grade III	Right - origin of primary	IIIC	IIIC	Blank(s)	Blank(s)	T4d	N3b	M0	T4d	N3b	M0	RE+RN	RE+RN	Regional	51	Unknown or not applicable	None; diagnosed at autopsy	Surgery performed	17	750	763	0	20	20	4	987	987	0	80	10	Blank(s)	988	5	5	0	11	4	Blank(s)	No	No	No	No	Alive	Alive or dead of other cause
29705722	Married (including common law)	65	Other (American Indian/AK Native, Asian/Pacific Islander)	C50.8-Overlapping lesion of breast	Poorly differentiated; Grade III	Left - origin of primary	IIIB	IIIB	Blank(s)	Blank(s)	T4d	N2a	M0	T4d	N2a	M0	RE+RN	RE+RN	Regional	51	Unknown or not applicable	None; diagnosed at autopsy	Surgery performed	80	725	510	0	20	20	98	987	987	0	90	20	Blank(s)	988	5	0	0	0	98	Blank(s)	No	No	No	No	Alive	Alive or dead of other cause
13007101	Divorced	66	Black	C50.4-Upper-outer quadrant of breast	Moderately differentiated; Grade II	Left - origin of primary	IV	IV	Blank(s)	Blank(s)	T4d	N3b	M1	T4d	N3b	M1	D	D	Distant	51	Unknown or not applicable	None; diagnosed at autopsy	Surgery performed	999	750	763	50	20	20	0	987	987	0	70	20	Blank(s)	988	5	5	0	7	0	Blank(s)	No	No	Yes	Unknown	Alive	Alive or dead of other cause
13011670	Married (including common law)	66	White	C50.4-Upper-outer quadrant of breast	Poorly differentiated; Grade III	Left - origin of primary	IIIB	IIIB	Blank(s)	Blank(s)	T4d	N1	M0	T4d	N1	M0	RE+RN	RE+RN	Regional	51	Unknown or not applicable	None; diagnosed at autopsy	Surgery performed	30	750	255	0	20	10	95	987	987	0	999	10	Blank(s)	988	5	5	0	11	0	Blank(s)	No	No	No	No	Alive	Alive or dead of other cause
29687088	Unknown	64	White	C50.9-Breast, NOS	Poorly differentiated; Grade III	Left - origin of primary	IIIB	IIIB	Blank(s)	Blank(s)	T4d	N1	M0	T4d	N1	M0	RE+RN	RE+RN	Regional	51	Unknown or not applicable	None; diagnosed at autopsy	Surgery performed	87	750	255	0	20	20	1	987	987	30	80	10	Blank(s)	988	5	5	0	1	1	Blank(s)	No	No	No	No	Alive	Alive or dead of other cause
53103480	Unknown	66	White	C50.9-Breast, NOS	Moderately differentiated; Grade II	Left - origin of primary	IIIB	IIIB	Blank(s)	Blank(s)	T4d	N1a	M0	T4d	N1a	M0	RE+RN	RE+RN	Regional	51	Unknown or not applicable	None; diagnosed at autopsy	Surgery performed	60	750	250	0	10	10	3	987	987	0	60	10	Blank(s)	988	5	3	0	18	3	Blank(s)	No	No	No	No	Alive	Alive or dead of other cause
53022718	Single (never married)	64	White	C50.9-Breast, NOS	Well differentiated; Grade I	Right - origin of primary	IIIC	IIIC	Blank(s)	Blank(s)	T4d	N3a	M0	T4d	N3a	M0	RE+RN	RE+RN	Regional	41	Unknown or not applicable	None; diagnosed at autopsy	Surgery performed	85	725	250	0	10	10	10	987	987	20	70	20	Blank(s)	988	6	6	0	13	10	Blank(s)	No	No	No	No	Alive	Alive or dead of other cause
81078870	Married (including common law)	64	White	C50.9-Breast, NOS	Poorly differentiated; Grade III	Left - origin of primary	IV	IV	Blank(s)	Blank(s)	T4d	N0	M1	T4d	N0	M1	D	D	Distant	41	Unknown or not applicable	None; diagnosed at autopsy	Surgery performed	16	750	0	44	10	10	0	0	0	20	80	20	Blank(s)	988	5	6	0	7	0	Blank(s)	Yes	No	No	Yes	Alive	Alive or dead of other cause
52023137	Unknown	62	White	C50.9-Breast, NOS	Moderately differentiated; Grade II	Left - origin of primary	IV	IV	Blank(s)	Blank(s)	T4d	N3a	M1	T4d	N3a	M1	D	D	Distant	50	Unknown or not applicable	None; diagnosed at autopsy	Surgery performed	100	750	250	44	10	20	16	987	987	20	120	20	Blank(s)	988	5	6	0	18	16	Blank(s)	Unknown	Unknown	Unknown	Unknown	Alive	Alive or dead of other cause
81079837	Married (including common law)	63	Black	C50.4-Upper-outer quadrant of breast	Unknown	Left - origin of primary	IIIB	IIIB	Blank(s)	Blank(s)	T4d	N1	M0	T4d	N1	M0	RE+RN	RE+RN	Regional	50	Unknown or not applicable	None; diagnosed at autopsy	Surgery performed	35	750	257	0	10	10	98	987	987	20	70	20	Blank(s)	988	6	0	0	0	98	Blank(s)	No	No	No	No	Breast	Dead (attributable to this cancer dx)
71321057	Divorced	64	Other (American Indian/AK Native, Asian/Pacific Islander)	C50.9-Breast, NOS	Poorly differentiated; Grade III	Right - origin of primary	IV	IV	Blank(s)	Blank(s)	T4d	N1NOS	M1	T4d	N1NOS	M1	D	D	Distant	51	Unknown or not applicable	Non-primary surgical procedure to other regional sites	Surgery performed	60	730	258	10	10	10	3	987	987	0	130	10	Blank(s)	988	5	6	0	8	3	Blank(s)	No	No	No	No	Alive	Alive or dead of other cause
19983685	Married (including common law)	64	White	C50.9-Breast, NOS	Poorly differentiated; Grade III	Left - origin of primary	IV	IV	Blank(s)	Blank(s)	T4d	NX	M1	T4d	NX	M1	D	D	Distant	41	Unknown or not applicable	None; diagnosed at autopsy	Surgery performed	80	750	999	40	20	20	98	987	987	0	90	20	Blank(s)	988	3	0	3	0	98	Blank(s)	Yes	No	No	No	Breast	Dead (attributable to this cancer dx)
80184532	Married (including common law)	60	White	C50.9-Breast, NOS	Moderately differentiated; Grade II	Right - origin of primary	IIIB	IIIB	Blank(s)	Blank(s)	T4d	N0	M0	T4d	N0	M0	RE	RE	Regional	51	Unknown or not applicable	None; diagnosed at autopsy	Surgery performed	110	750	0	0	10	10	0	0	0	0	70	10	Blank(s)	988	0	3	0	13	0	Blank(s)	No	No	No	No	Alive	Alive or dead of other cause
81079541	Widowed	62	White	C50.8-Overlapping lesion of breast	Moderately differentiated; Grade II	Right - origin of primary	IIIB	IIIB	Blank(s)	Blank(s)	T4d	N1	M0	T4d	N1	M0	RE+RN	RE+RN	Regional	51	Unknown or not applicable	None; diagnosed at autopsy	Surgery performed	73	730	255	0	10	20	95	987	987	0	60	10	Blank(s)	988	5	5	0	95	95	Blank(s)	No	No	No	No	Alive	Alive or dead of other cause
77006753	Single (never married)	61	White	C50.8-Overlapping lesion of breast	Poorly differentiated; Grade III	Right - origin of primary	IIIB	IIIB	Blank(s)	Blank(s)	T4d	N2a	M0	T4d	N2a	M0	RE+RN	RE+RN	Regional	41	Unknown or not applicable	None; diagnosed at autopsy	Surgery performed	6	750	600	0	10	20	5	987	987	20	30	10	Blank(s)	988	6	6	0	10	5	Blank(s)	No	No	No	No	Alive	Alive or dead of other cause
68870396	Single (never married)	60	Other (American Indian/AK Native, Asian/Pacific Islander)	C50.1-Central portion of breast	Poorly differentiated; Grade III	Right - origin of primary	IIIB	IIIB	Blank(s)	Blank(s)	T4d	N1a	M0	T4d	N1a	M0	RE+RN	RE+RN	Regional	51	Unknown or not applicable	None; diagnosed at autopsy	Surgery performed	95	750	250	0	10	20	1	987	987	0	80	20	Blank(s)	988	3	3	0	19	1	Blank(s)	No	No	No	No	Alive	Alive or dead of other cause
71324439	Married (including common law)	62	White	C50.6-Axillary tail of breast	Unknown	Right - origin of primary	IIIB	IIIB	Blank(s)	Blank(s)	T4d	N2NOS	M0	T4d	N2NOS	M0	RE+RN	RE+RN	Regional	41	Unknown or not applicable	None; diagnosed at autopsy	Surgery performed	70	750	630	0	20	20	1	987	987	0	999	20	Blank(s)	988	5	3	0	20	1	Blank(s)	No	No	No	No	Alive	Alive or dead of other cause
51971471	Married (including common law)	60	White	C50.9-Breast, NOS	Poorly differentiated; Grade III	Right - origin of primary	IV	IV	Blank(s)	Blank(s)	T4d	N2a	M1	T4d	N2a	M1	D	D	Distant	41	Unknown or not applicable	None; diagnosed at autopsy	Surgery performed	2	750	250	44	10	20	5	987	987	0	80	20	Blank(s)	988	5	6	0	5	5	Blank(s)	No	No	No	Yes	Breast	Dead (attributable to this cancer dx)
77024779	Divorced	62	White	C50.9-Breast, NOS	Moderately differentiated; Grade II	Left - origin of primary	IIIB	IIIB	Blank(s)	Blank(s)	T4d	N0	M0	T4d	N0	M0	RE	RE	Regional	41	Unknown or not applicable	None; diagnosed at autopsy	Surgery performed	999	750	0	0	20	20	0	0	0	0	120	20	Blank(s)	988	3	3	0	3	0	Blank(s)	No	No	No	No	Alive	Alive or dead of other cause
93736453	Married (including common law)	61	White	C50.9-Breast, NOS	Moderately differentiated; Grade II	Right - origin of primary	IIIB	IIIB	Blank(s)	Blank(s)	T4d	N0(i-)	M0	T4d	N0(i-)	M0	RE	RE	Regional	50	Unknown or not applicable	None; diagnosed at autopsy	Surgery performed	6	750	0	0	20	20	0	1	1	20	60	10	Blank(s)	988	5	5	0	2	0	Blank(s)	No	No	No	No	Breast	Dead (attributable to this cancer dx)
77004459	Married (including common law)	60	White	C50.8-Overlapping lesion of breast	Moderately differentiated; Grade II	Left - origin of primary	IIIB	IIIB	Blank(s)	Blank(s)	T4d	N1a	M0	T4d	N1a	M0	RE+RN	RE+RN	Regional	52	Unknown or not applicable	None; diagnosed at autopsy	Surgery performed	998	750	250	0	10	10	1	987	987	50	80	20	Blank(s)	988	6	6	0	17	1	Blank(s)	No	No	No	No	Alive	Alive or dead of other cause
76210113	Married (including common law)	61	White	C50.2-Upper-inner quadrant of breast	Unknown	Left - origin of primary	IIIC	IIIC	Blank(s)	Blank(s)	T4d	N3b	M0	T4d	N3b	M0	RE+RN	RE+RN	Regional	51	Unknown or not applicable	None; diagnosed at autopsy	Surgery performed	30	750	763	0	20	20	4	987	987	0	90	988	Blank(s)	988	5	5	0	7	4	Blank(s)	No	No	No	No	Alive	Alive or dead of other cause
19910901	Divorced	60	White	C50.2-Upper-inner quadrant of breast	Moderately differentiated; Grade II	Left - origin of primary	IIIB	IIIB	Blank(s)	Blank(s)	T4d	N0(i-)	M0	T4d	N0(i-)	M0	RE	RE	Regional	51	Unknown or not applicable	None; diagnosed at autopsy	Surgery performed	25	750	0	0	10	20	0	1	0	0	120	10	Blank(s)	988	5	6	0	2	0	Blank(s)	No	No	No	No	Alive	Alive or dead of other cause
71522047	Married (including common law)	64	White	C50.2-Upper-inner quadrant of breast	Poorly differentiated; Grade III	Right - origin of primary	IIIB	IIIB	Blank(s)	Blank(s)	T4d	N0	M0	T4d	N0	M0	RE	RE	Regional	41	Unknown or not applicable	None; diagnosed at autopsy	Surgery performed	60	750	0	0	20	20	0	0	0	50	80	10	Blank(s)	988	5	5	0	11	0	Blank(s)	No	No	No	No	Alive	Alive or dead of other cause
44178146	Divorced	61	White	C50.9-Breast, NOS	Poorly differentiated; Grade III	Right - origin of primary	IV	IV	Blank(s)	Blank(s)	T4d	N1	M1	T4d	N1	M1	D	D	Distant	41	Unknown or not applicable	None; diagnosed at autopsy	Surgery performed	999	750	255	40	999	999	1	987	987	987	999	999	Blank(s)	988	6	5	3	1	1	Blank(s)	Yes	No	Yes	No	Breast	Dead (attributable to this cancer dx)
70142758	Single (never married)	61	White	C50.4-Upper-outer quadrant of breast	Unknown	Left - origin of primary	IIIB	IIIB	Blank(s)	Blank(s)	T4d	N1NOS	M0	T4d	N1NOS	M0	RE+RN	RE+RN	Regional	51	Unknown or not applicable	None; diagnosed at autopsy	Surgery performed	998	725	258	0	20	20	2	987	987	0	30	20	Blank(s)	988	1	6	0	6	2	Blank(s)	No	No	No	No	Alive	Alive or dead of other cause
51973018	Divorced	59	Black	C50.5-Lower-outer quadrant of breast	Moderately differentiated; Grade II	Right - origin of primary	IIIB	IIIB	Blank(s)	Blank(s)	T4d	N1a	M0	T4d	N1a	M0	RE+RN	RE+RN	Regional	50	Unknown or not applicable	Non-primary surgical procedure performed	Surgery performed	130	725	260	0	10	10	3	987	987	0	120	10	Blank(s)	988	5	6	0	5	3	Blank(s)	No	No	No	No	Alive	Alive or dead of other cause
52050233	Single (never married)	60	White	C50.1-Central portion of breast	Moderately differentiated; Grade II	Left - origin of primary	IIIC	IIIC	Blank(s)	Blank(s)	T4d	N3c	M0	T4d	N3c	M0	D	D	Distant	51	Unknown or not applicable	None; diagnosed at autopsy	Surgery performed	80	750	800	0	20	20	1	987	987	0	120	10	Blank(s)	988	5	5	0	7	1	Blank(s)	No	No	No	No	Alive	Alive or dead of other cause
70229816	Married (including common law)	62	White	C50.9-Breast, NOS	Moderately differentiated; Grade II	Right - origin of primary	IIIC	IIIC	Blank(s)	Blank(s)	T4d	N3a	M0	T4d	N3a	M0	D	RE+RN	Regional	50	Unknown or not applicable	None; diagnosed at autopsy	Surgery performed	98	750	750	0	20	20	16	987	987	0	60	10	Blank(s)	988	6	6	0	29	16	Blank(s)	No	No	No	No	Breast	Dead (attributable to this cancer dx)
70215985	Married (including common law)	61	White	C50.9-Breast, NOS	Poorly differentiated; Grade III	Right - origin of primary	IV	IV	Blank(s)	Blank(s)	T4d	N1	M1	T4d	N1	M1	D	D	Distant	40	Unknown or not applicable	None; diagnosed at autopsy	Surgery performed	998	750	600	50	20	20	98	987	987	987	70	10	Blank(s)	988	5	0	0	0	98	Blank(s)	Unknown	Unknown	Unknown	Unknown	Breast	Dead (attributable to this cancer dx)
68876579	Single (never married)	59	White	C50.9-Breast, NOS	Poorly differentiated; Grade III	Left - origin of primary	IV	IV	Blank(s)	Blank(s)	T4d	N2NOS	M1	T4d	N2NOS	M1	D	D	Distant	51	Unknown or not applicable	None; diagnosed at autopsy	Surgery performed	80	750	610	40	20	20	1	987	987	20	90	10	Blank(s)	988	5	5	0	10	1	Blank(s)	Yes	No	Unknown	Unknown	Alive	Alive or dead of other cause
5381780	Single (never married)	59	White	C50.4-Upper-outer quadrant of breast	Poorly differentiated; Grade III	Right - origin of primary	IIIB	IIIB	Blank(s)	Blank(s)	T4d	N1	M0	T4d	N1	M0	RE+RN	RE+RN	Regional	51	Unknown or not applicable	None; diagnosed at autopsy	Surgery performed	998	750	255	0	20	20	52	987	987	50	130	10	Blank(s)	988	5	5	0	53	52	Blank(s)	No	No	No	No	Breast	Dead (attributable to this cancer dx)
19961418	Married (including common law)	62	White	C50.8-Overlapping lesion of breast	Moderately differentiated; Grade II	Right - origin of primary	IIIB	IIIB	Blank(s)	Blank(s)	T4d	N0	M0	T4d	N0	M0	RE	RE	Regional	51	Unknown or not applicable	None; diagnosed at autopsy	Surgery performed	140	750	0	0	10	20	0	0	0	0	130	10	Blank(s)	988	5	3	0	21	0	Blank(s)	No	No	No	No	Alive	Alive or dead of other cause
22134263	Single (never married)	60	White	C50.9-Breast, NOS	Moderately differentiated; Grade II	Bilateral, single primary	IIIB	IIIB	Blank(s)	Blank(s)	T4d	N2a	M0	T4d	N2a	M0	RE+RN	RE+RN	Regional	50	Unknown or not applicable	None; diagnosed at autopsy	Surgery performed	999	730	520	0	10	10	7	987	987	0	70	20	Blank(s)	988	1	6	0	21	7	Blank(s)	No	No	No	No	Alive	Alive or dead of other cause
71370563	Married (including common law)	61	White	C50.1-Central portion of breast	Poorly differentiated; Grade III	Right - origin of primary	IIIB	IIIB	Blank(s)	Blank(s)	T4d	N1a	M0	T4d	N1a	M0	RE+RN	RE+RN	Regional	42	Unknown or not applicable	None; diagnosed at autopsy	Surgery performed	115	725	250	0	10	10	2	987	987	50	80	10	Blank(s)	988	6	6	0	3	2	Blank(s)	No	No	No	No	Alive	Alive or dead of other cause
93862095	Single (never married)	61	White	C50.9-Breast, NOS	Poorly differentiated; Grade III	Left - origin of primary	IIIC	IIIC	Blank(s)	Blank(s)	T4d	N3c	M0	T4d	N3c	M0	D	D	Distant	51	Unknown or not applicable	None; diagnosed at autopsy	Surgery performed	998	750	800	0	20	10	7	987	987	20	80	10	Blank(s)	988	5	5	0	8	7	Blank(s)	No	No	No	No	Breast	Dead (attributable to this cancer dx)
77019460	Married (including common law)	61	White	C50.9-Breast, NOS	Poorly differentiated; Grade III	Right - origin of primary	IIIB	IIIB	Blank(s)	Blank(s)	T4d	N0	M0	T4d	N0	M0	RE	RE	Regional	47	Unknown or not applicable	None; diagnosed at autopsy	Surgery performed	30	750	0	0	20	20	0	0	0	0	30	20	Blank(s)	988	5	5	0	1	0	Blank(s)	No	No	No	No	Alive	Alive or dead of other cause
98205078	Married (including common law)	61	White	C50.8-Overlapping lesion of breast	Poorly differentiated; Grade III	Right - origin of primary	IIIB	IIIB	Blank(s)	Blank(s)	T4d	N1	M0	T4d	N1	M0	RE+RN	RE+RN	Regional	51	Unknown or not applicable	Non-primary surgical procedure to distant site	Surgery performed	50	725	255	0	10	10	95	987	987	987	120	20	Blank(s)	988	5	5	0	95	95	Blank(s)	No	No	No	No	Alive	Alive or dead of other cause
27158190	Widowed	62	White	C50.9-Breast, NOS	Poorly differentiated; Grade III	Left - origin of primary	IV	IV	Blank(s)	Blank(s)	T4d	N1a	M1	T4d	N1a	M1	D	D	Distant	52	Unknown or not applicable	None; diagnosed at autopsy	Surgery performed	19	730	600	44	10	10	1	987	987	50	120	20	Blank(s)	988	5	3	0	5	1	Blank(s)	No	No	No	Yes	Breast	Dead (attributable to this cancer dx)
71379501	Widowed	62	White	C50.9-Breast, NOS	Unknown	Left - origin of primary	IIIB	IIIB	Blank(s)	Blank(s)	T4d	N1	M0	T4d	N1	M0	RE+RN	RE+RN	Regional	51	Unknown or not applicable	None; diagnosed at autopsy	Surgery performed	44	750	255	0	20	20	10	987	987	30	998	20	Blank(s)	988	5	5	0	11	10	Blank(s)	No	No	No	No	Alive	Alive or dead of other cause
12918455	Divorced	59	White	C50.8-Overlapping lesion of breast	Poorly differentiated; Grade III	Left - origin of primary	IIIB	IIIB	Blank(s)	Blank(s)	T4d	N1a	M0	T4d	N1a	M0	RE+RN	RE+RN	Regional	51	Unknown or not applicable	None; diagnosed at autopsy	Surgery performed	10	750	250	0	10	10	3	987	987	20	80	20	Blank(s)	988	5	6	0	20	3	Blank(s)	No	No	No	No	Alive	Alive or dead of other cause
71437275	Married (including common law)	60	White	C50.8-Overlapping lesion of breast	Poorly differentiated; Grade III	Left - origin of primary	IIIC	IIIC	Blank(s)	Blank(s)	T4d	N3a	M0	T4d	N3a	M0	D	RE+RN	Regional	42	Unknown or not applicable	None; diagnosed at autopsy	Surgery performed	30	750	750	0	20	20	11	987	987	0	130	20	Blank(s)	988	6	5	0	16	11	Blank(s)	No	No	No	No	Alive	Alive or dead of other cause
41452319	Divorced	60	Black	C50.5-Lower-outer quadrant of breast	Unknown	Left - origin of primary	IIIC	IIIC	Blank(s)	Blank(s)	T4d	N3NOS	M0	T4d	N3NOS	M0	RE+RN	RE+RN	Regional	51	Unknown or not applicable	None; diagnosed at autopsy	Surgery performed	130	750	820	0	10	10	99	987	987	987	999	20	Blank(s)	988	6	6	0	22	22	Blank(s)	No	No	No	No	Breast	Dead (attributable to this cancer dx)
69991805	Divorced	59	White	C50.9-Breast, NOS	Poorly differentiated; Grade III	Right - origin of primary	IIIB	IIIB	Blank(s)	Blank(s)	T4d	N1mi	M0	T4d	N1mi	M0	RE+RN	RE+RN	Regional	51	Unknown or not applicable	None; diagnosed at autopsy	Surgery performed	100	750	155	0	10	10	36	987	987	0	999	20	Blank(s)	988	3	3	0	36	36	Blank(s)	No	No	No	No	Alive	Alive or dead of other cause
81124670	Married (including common law)	62	White	C50.8-Overlapping lesion of breast	Poorly differentiated; Grade III	Left - origin of primary	IIIB	IIIB	Blank(s)	Blank(s)	T4d	N1	M0	T4d	N1	M0	RE+RN	RE+RN	Regional	52	Unknown or not applicable	None; diagnosed at autopsy	Surgery performed	999	750	255	0	20	20	0	987	987	60	999	20	Blank(s)	988	5	5	0	15	0	Blank(s)	No	No	No	No	Alive	Alive or dead of other cause
29665340	Married (including common law)	59	Other (American Indian/AK Native, Asian/Pacific Islander)	C50.9-Breast, NOS	Moderately differentiated; Grade II	Left - origin of primary	IIIC	IIIC	Blank(s)	Blank(s)	T4d	N3a	M0	T4d	N3a	M0	RE+RN	RE+RN	Regional	51	Unknown or not applicable	None; diagnosed at autopsy	Surgery performed	998	750	520	0	10	20	29	987	987	50	70	988	Blank(s)	988	3	3	0	29	29	Blank(s)	No	No	No	No	Breast	Dead (attributable to this cancer dx)
69988207	Married (including common law)	59	White	C50.8-Overlapping lesion of breast	Poorly differentiated; Grade III	Left - origin of primary	IV	IV	Blank(s)	Blank(s)	T4d	N3c	M1	T4d	N3c	M1	D	D	Distant	72	Unknown or not applicable	None; diagnosed at autopsy	Surgery performed	25	750	800	44	10	10	98	987	987	0	80	20	Blank(s)	988	5	0	0	0	98	Blank(s)	Yes	No	No	No	Alive	Alive or dead of other cause
70100334	Married (including common law)	60	White	C50.9-Breast, NOS	Unknown	Left - origin of primary	IIIB	IIIB	Blank(s)	Blank(s)	T4d	N0	M0	T4d	N0	M0	RE	RE	Regional	51	Unknown or not applicable	None; diagnosed at autopsy	Surgery performed	998	750	0	0	10	20	0	0	0	0	80	10	Blank(s)	988	1	6	0	7	0	Blank(s)	No	No	No	No	Alive	Alive or dead of other cause
77143170	Single (never married)	62	White	C50.1-Central portion of breast	Unknown	Right - origin of primary	IIIB	IIIB	Blank(s)	Blank(s)	T4d	N1	M0	T4d	N1	M0	RE+RN	RE+RN	Regional	41	Unknown or not applicable	None; diagnosed at autopsy	Surgery performed	65	750	255	0	999	999	98	987	987	987	999	999	Blank(s)	988	5	0	0	0	98	Blank(s)	No	No	No	No	Alive	Alive or dead of other cause
80197062	Divorced	57	Black	C50.1-Central portion of breast	Poorly differentiated; Grade III	Left - origin of primary	IIIC	IIIC	Blank(s)	Blank(s)	T4d	N3a	M0	T4d	N3a	M0	D	RE+RN	Regional	51	Unknown or not applicable	Non-primary surgical procedure to distant site	Surgery performed	9	725	750	0	20	20	11	987	987	20	80	20	Blank(s)	988	5	6	0	13	11	Blank(s)	No	No	No	No	Breast	Dead (attributable to this cancer dx)
92735207	Divorced	58	White	C50.8-Overlapping lesion of breast	Poorly differentiated; Grade III	Left - origin of primary	IV	IV	Blank(s)	Blank(s)	T4d	N0	M1	T4d	N0	M1	D	D	Distant	53	Unknown or not applicable	None; diagnosed at autopsy	Surgery performed	998	750	0	50	10	10	98	0	0	0	60	20	Blank(s)	988	1	0	0	0	98	Blank(s)	Yes	No	No	Yes	Breast	Dead (attributable to this cancer dx)
68843280	Single (never married)	57	White	C50.8-Overlapping lesion of breast	Poorly differentiated; Grade III	Right - origin of primary	IIIC	IIIC	Blank(s)	Blank(s)	T4d	N3a	M0	T4d	N3a	M0	RE+RN	RE+RN	Regional	52	Unknown or not applicable	Non-primary surgical procedure to distant lymph node(s)	Surgery performed	125	750	250	0	20	20	11	987	987	0	80	20	Blank(s)	988	6	6	0	17	11	Blank(s)	No	No	No	No	Alive	Alive or dead of other cause
71322298	Married (including common law)	60	White	C50.9-Breast, NOS	Moderately differentiated; Grade II	Right - origin of primary	IIIB	IIIB	Blank(s)	Blank(s)	T4d	N1a	M0	T4d	N1a	M0	RE+RN	RE+RN	Regional	51	Unknown or not applicable	None; diagnosed at autopsy	Surgery performed	25	750	250	0	10	10	2	987	987	0	30	20	Blank(s)	988	3	3	0	9	2	Blank(s)	No	No	No	No	Breast	Dead (attributable to this cancer dx)
29732297	Divorced	60	White	C50.9-Breast, NOS	Unknown	Right - origin of primary	IIIB	IIIB	Blank(s)	Blank(s)	T4d	N1a	M0	T4d	N1a	M0	RE+RN	RE+RN	Regional	51	Unknown or not applicable	None; diagnosed at autopsy	Surgery performed	998	750	250	0	20	20	1	987	987	0	999	10	Blank(s)	988	5	3	0	12	1	Blank(s)	No	No	No	No	Alive	Alive or dead of other cause
76219728	Single (never married)	58	White	C50.9-Breast, NOS	Unknown	Left - origin of primary	IV	IV	Blank(s)	Blank(s)	T4d	N1	M1	T4d	N1	M1	D	D	Distant	52	Unknown or not applicable	Non-primary surgical procedure to distant lymph node(s)	Surgery performed	999	750	255	10	20	20	1	987	987	60	999	20	Blank(s)	988	5	5	5	7	1	Blank(s)	No	No	No	No	Breast	Dead (attributable to this cancer dx)
69961455	Married (including common law)	57	White	C50.8-Overlapping lesion of breast	Poorly differentiated; Grade III	Left - origin of primary	IIIB	IIIB	Blank(s)	Blank(s)	T4d	N1a	M0	T4d	N1a	M0	RE+RN	RE+RN	Regional	56	Unknown or not applicable	None; diagnosed at autopsy	Surgery performed	80	730	250	0	20	20	2	987	987	40	70	20	Blank(s)	988	1	6	0	10	2	Blank(s)	No	No	No	No	Alive	Alive or dead of other cause
12952179	Divorced	60	White	C50.9-Breast, NOS	Poorly differentiated; Grade III	Left - origin of primary	IV	IV	Blank(s)	Blank(s)	T4d	N3c	M1	T4d	N3c	M1	D	D	Distant	50	Unknown or not applicable	None; diagnosed at autopsy	Surgery performed	999	750	800	10	20	20	2	987	987	0	90	20	Blank(s)	988	5	5	0	9	2	Blank(s)	No	No	No	No	Alive	Alive or dead of other cause
99135349	Widowed	61	White	C50.5-Lower-outer quadrant of breast	Poorly differentiated; Grade III	Left - origin of primary	IIIC	IIIC	Blank(s)	Blank(s)	T4d	N3a	M0	T4d	N3a	M0	D	RE+RN	Regional	42	Unknown or not applicable	None; diagnosed at autopsy	Surgery performed	39	750	755	0	998	998	4	987	987	987	80	998	Blank(s)	988	3	3	0	4	4	Blank(s)	No	No	No	No	Alive	Alive or dead of other cause
52967062	Separated	59	White	C50.8-Overlapping lesion of breast	Poorly differentiated; Grade III	Right - origin of primary	IIIB	IIIB	Blank(s)	Blank(s)	T4d	N1a	M0	T4d	N1a	M0	RE+RN	RE+RN	Regional	51	Unknown or not applicable	None; diagnosed at autopsy	Surgery performed	75	750	250	0	10	10	2	987	987	20	90	20	Blank(s)	988	3	3	0	2	2	Blank(s)	No	No	No	No	Alive	Alive or dead of other cause
70063788	Married (including common law)	57	Other (American Indian/AK Native, Asian/Pacific Islander)	C50.1-Central portion of breast	Poorly differentiated; Grade III	Right - origin of primary	IIIB	IIIB	Blank(s)	Blank(s)	T4d	N1a	M0	T4d	N1a	M0	RE+RN	RE+RN	Regional	51	Unknown or not applicable	None; diagnosed at autopsy	Surgery performed	85	750	250	0	20	20	2	987	987	0	90	10	Blank(s)	988	3	3	0	13	2	Blank(s)	No	No	No	No	Alive	Alive or dead of other cause
71312495	Married (including common law)	58	White	C50.2-Upper-inner quadrant of breast	Unknown	Right - origin of primary	IIIB	IIIB	Blank(s)	Blank(s)	T4d	N1a	M0	T4d	N1a	M0	RE+RN	RE+RN	Regional	48	Unknown or not applicable	None; diagnosed at autopsy	Surgery performed	999	750	250	0	10	10	2	987	987	60	60	10	Blank(s)	988	5	6	0	2	2	Blank(s)	No	No	No	No	Alive	Alive or dead of other cause
98087248	Married (including common law)	57	White	C50.4-Upper-outer quadrant of breast	Poorly differentiated; Grade III	Right - origin of primary	IIIB	IIIB	Blank(s)	Blank(s)	T4d	N1	M0	T4d	N1	M0	RE+RN	RE+RN	Regional	51	Unknown or not applicable	None; diagnosed at autopsy	Surgery performed	40	730	255	0	10	10	99	987	987	987	80	20	Blank(s)	988	5	5	0	98	99	Blank(s)	No	No	No	No	Breast	Dead (attributable to this cancer dx)
94879768	Divorced	59	White	C50.8-Overlapping lesion of breast	Poorly differentiated; Grade III	Right - origin of primary	IIIB	IIIB	Blank(s)	Blank(s)	T4d	N1NOS	M0	T4d	N1NOS	M0	RE+RN	RE+RN	Regional	51	Unknown or not applicable	None; diagnosed at autopsy	Surgery performed	30	750	258	0	10	10	1	987	987	0	130	10	Blank(s)	988	5	6	0	13	1	Blank(s)	No	No	No	No	Alive	Alive or dead of other cause
38215966	Divorced	60	White	C50.8-Overlapping lesion of breast	Moderately differentiated; Grade II	Right - origin of primary	IIIB	IIIB	Blank(s)	Blank(s)	T4d	N1a	M0	T4d	N1a	M0	RE+RN	RE+RN	Regional	51	Unknown or not applicable	None; diagnosed at autopsy	Surgery performed	999	750	250	0	10	10	3	987	987	60	60	20	Blank(s)	988	6	6	0	7	3	Blank(s)	No	No	No	No	Alive	Alive or dead of other cause
38198660	Married (including common law)	59	White	C50.9-Breast, NOS	Unknown	Right - origin of primary	IIIC	IIIC	Blank(s)	Blank(s)	T4d	N3b	M0	T4d	N3b	M0	RE+RN	RE+RN	Regional	51	Unknown or not applicable	None; diagnosed at autopsy	Surgery performed	43	750	763	0	20	10	95	987	987	0	999	10	Blank(s)	988	5	5	0	8	95	Blank(s)	No	No	No	No	Alive	Alive or dead of other cause
44199282	Married (including common law)	58	White	C50.8-Overlapping lesion of breast	Moderately differentiated; Grade II	Right - origin of primary	IIIB	IIIB	Blank(s)	Blank(s)	T4d	N2NOS	M0	T4d	N2NOS	M0	RE+RN	RE+RN	Regional	44	Unknown or not applicable	None; diagnosed at autopsy	Surgery performed	60	730	620	0	10	10	9	987	987	987	120	20	Blank(s)	988	5	6	0	11	9	Blank(s)	No	No	No	No	Alive	Alive or dead of other cause
27126886	Single (never married)	57	White	C50.9-Breast, NOS	Moderately differentiated; Grade II	Left - origin of primary	IV	IV	Blank(s)	Blank(s)	T4d	N1	M1	T4d	N1	M1	D	D	Distant	51	Unknown or not applicable	None; diagnosed at autopsy	Surgery performed	998	750	255	40	20	20	0	987	987	0	60	20	Blank(s)	988	5	5	0	3	0	Blank(s)	No	No	No	Yes	Breast	Dead (attributable to this cancer dx)
52105641	Single (never married)	57	Black	C50.8-Overlapping lesion of breast	Poorly differentiated; Grade III	Left - origin of primary	IIIC	IIIC	Blank(s)	Blank(s)	T4d	N3b	M0	T4d	N3b	M0	D	RE+RN	Regional	52	Unknown or not applicable	None; diagnosed at autopsy	Surgery performed	181	750	765	0	20	20	20	987	987	0	90	20	Blank(s)	988	6	6	0	53	53	Blank(s)	No	No	No	No	Miscellaneous Malignant Cancer	Dead (attributable to this cancer dx)
71289974	Unknown	58	White	C50.9-Breast, NOS	Poorly differentiated; Grade III	Left - origin of primary	IV	IV	Blank(s)	Blank(s)	T4d	N2a	M1	T4d	N2a	M1	D	D	Distant	52	Unknown or not applicable	None; diagnosed at autopsy	Surgery performed	100	750	510	10	20	20	6	987	987	0	90	10	Blank(s)	988	5	5	3	19	6	Blank(s)	No	No	No	No	Breast	Dead (attributable to this cancer dx)
6228561	Divorced	59	White	C50.4-Upper-outer quadrant of breast	Poorly differentiated; Grade III	Right - origin of primary	IIIB	IIIB	Blank(s)	Blank(s)	T4d	N1a	M0	T4d	N1a	M0	RE+RN	RE+RN	Regional	51	Unknown or not applicable	None; diagnosed at autopsy	Surgery performed	112	750	520	0	10	10	3	987	987	0	130	20	Blank(s)	988	6	6	0	12	3	Blank(s)	No	No	No	No	Breast	Dead (attributable to this cancer dx)
52022552	Separated	57	White	C50.1-Central portion of breast	Poorly differentiated; Grade III	Left - origin of primary	IIIB	IIIB	Blank(s)	Blank(s)	T4d	N1mi	M0	T4d	N1mi	M0	RE+RN	RE+RN	Regional	40	Unknown or not applicable	None; diagnosed at autopsy	Surgery performed	7	750	130	0	20	20	24	987	987	20	70	10	Blank(s)	988	6	3	0	27	24	Blank(s)	No	No	No	No	Breast	Dead (attributable to this cancer dx)
12995054	Married (including common law)	58	White	C50.2-Upper-inner quadrant of breast	Poorly differentiated; Grade III	Right - origin of primary	IIIB	IIIB	Blank(s)	Blank(s)	T4d	N2a	M0	T4d	N2a	M0	RE+RN	RE+RN	Regional	51	Unknown or not applicable	None; diagnosed at autopsy	Surgery performed	15	750	510	0	10	20	95	987	987	20	80	10	Blank(s)	988	5	5	0	18	0	Blank(s)	No	No	No	No	Alive	Alive or dead of other cause
71322194	Unknown	58	Black	C50.1-Central portion of breast	Moderately differentiated; Grade II	Right - origin of primary	IIIC	IIIC	Blank(s)	Blank(s)	T4d	N3NOS	M0	T4d	N3NOS	M0	RE+RN	RE+RN	Regional	80	Unknown or not applicable	None; diagnosed at autopsy	Surgery performed	40	750	815	0	10	10	2	987	987	40	120	20	Blank(s)	988	5	6	0	2	2	Blank(s)	No	No	No	No	Alive	Alive or dead of other cause
77043378	Married (including common law)	56	White	C50.8-Overlapping lesion of breast	Poorly differentiated; Grade III	Left - origin of primary	IIIB	IIIB	Blank(s)	Blank(s)	T4d	N1mi	M0	T4d	N1mi	M0	RE+RN	RE+RN	Regional	51	Unknown or not applicable	None; diagnosed at autopsy	Surgery performed	999	750	130	0	20	20	3	987	987	60	999	999	Blank(s)	988	5	6	0	17	3	Blank(s)	No	No	No	No	Alive	Alive or dead of other cause
77051102	Single (never married)	56	Black	C50.0-Nipple	Moderately differentiated; Grade II	Right - origin of primary	IV	IV	Blank(s)	Blank(s)	T4d	N3a	M1	T4d	N3a	M1	D	D	Distant	51	Unknown or not applicable	None; diagnosed at autopsy	Surgery performed	125	750	755	40	10	20	12	987	987	987	70	20	Blank(s)	988	5	5	0	15	12	Blank(s)	No	No	Yes	No	Breast	Dead (attributable to this cancer dx)
93820443	Married (including common law)	56	White	C50.2-Upper-inner quadrant of breast	Poorly differentiated; Grade III	Left - origin of primary	IIIB	IIIB	Blank(s)	Blank(s)	T4d	N1	M0	T4d	N1	M0	RE+RN	RE+RN	Regional	47	Unknown or not applicable	None; diagnosed at autopsy	Surgery performed	51	750	257	0	10	20	95	987	987	0	130	10	Blank(s)	988	5	5	0	4	0	Blank(s)	No	No	No	No	Alive	Alive or dead of other cause
98110540	Married (including common law)	55	White	C50.4-Upper-outer quadrant of breast	Poorly differentiated; Grade III	Left - origin of primary	IIIB	IIIB	Blank(s)	Blank(s)	T4d	N0	M0	T4d	N0	M0	RE	RE	Regional	50	Unknown or not applicable	None; diagnosed at autopsy	Surgery performed	88	750	0	0	10	20	0	0	0	0	999	10	Blank(s)	988	0	6	0	12	0	Blank(s)	No	No	No	No	Alive	Alive or dead of other cause
77066931	Married (including common law)	56	White	C50.9-Breast, NOS	Unknown	Left - origin of primary	IIIB	IIIB	Blank(s)	Blank(s)	T4d	N1	M0	T4d	N1	M0	RE+RN	RE+RN	Regional	52	Unknown or not applicable	None; diagnosed at autopsy	Surgery performed	998	750	255	0	20	20	16	987	987	0	120	20	Blank(s)	988	5	5	0	23	16	Blank(s)	No	No	No	No	Breast	Dead (attributable to this cancer dx)
52117387	Widowed	56	White	C50.4-Upper-outer quadrant of breast	Undifferentiated; anaplastic; Grade IV	Right - origin of primary	IIIC	IIIC	Blank(s)	Blank(s)	T4d	N3b	M0	T4d	N3b	M0	D	RE+RN	Regional	51	Unknown or not applicable	None; diagnosed at autopsy	Surgery performed	130	750	765	0	20	20	16	987	987	0	90	20	Blank(s)	988	6	6	0	16	16	Blank(s)	No	No	No	No	Chronic Liver Disease and Cirrhosis	Alive or dead of other cause
19884825	Single (never married)	55	Black	C50.9-Breast, NOS	Poorly differentiated; Grade III	Right - origin of primary	IV	IV	Blank(s)	Blank(s)	T4d	N0	M1	T4d	N0	M1	D	D	Distant	41	Unknown or not applicable	None; diagnosed at autopsy	Surgery performed	145	750	0	50	20	20	98	0	0	0	90	20	Blank(s)	988	6	0	0	0	98	Blank(s)	No	No	No	Yes	Breast	Dead (attributable to this cancer dx)
68862200	Married (including common law)	54	White	C50.9-Breast, NOS	Poorly differentiated; Grade III	Right - origin of primary	IIIB	IIIB	Blank(s)	Blank(s)	T4d	N2a	M0	T4d	N2a	M0	RE+RN	RE+RN	Regional	51	Unknown or not applicable	None; diagnosed at autopsy	Surgery performed	55	750	520	0	10	10	7	987	987	20	90	10	Blank(s)	988	3	3	0	10	7	Blank(s)	No	No	No	No	Alive	Alive or dead of other cause
70028625	Single (never married)	55	Other (American Indian/AK Native, Asian/Pacific Islander)	C50.9-Breast, NOS	Moderately differentiated; Grade II	Left - origin of primary	IIIB	IIIB	Blank(s)	Blank(s)	T4d	N0	M0	T4d	N0	M0	RE	RE	Regional	51	Unknown or not applicable	None; diagnosed at autopsy	Surgery performed	28	750	0	0	20	20	0	0	0	20	90	20	Blank(s)	988	5	5	0	8	0	Blank(s)	No	No	No	No	Alive	Alive or dead of other cause
68798016	Married (including common law)	53	White	C50.9-Breast, NOS	Undifferentiated; anaplastic; Grade IV	Right - origin of primary	IV	IV	Blank(s)	Blank(s)	T4d	N2a	M1	T4d	N2a	M1	D	D	Distant	51	Unknown or not applicable	None; diagnosed at autopsy	Surgery performed	43	750	510	40	10	20	0	987	987	0	80	10	Blank(s)	988	5	5	0	13	0	Blank(s)	No	No	Yes	No	Alive	Alive or dead of other cause
29722707	Divorced	56	White	C50.4-Upper-outer quadrant of breast	Poorly differentiated; Grade III	Right - origin of primary	IV	IV	Blank(s)	Blank(s)	T4d	N1	M1	T4d	N1	M1	D	D	Distant	51	Unknown or not applicable	None; diagnosed at autopsy	Surgery performed	15	750	257	44	10	10	1	987	987	50	80	10	Blank(s)	988	5	5	0	10	1	Blank(s)	Yes	No	No	No	Alive	Alive or dead of other cause
68815869	Single (never married)	53	White	C50.9-Breast, NOS	Unknown	Right - origin of primary	IV	IV	Blank(s)	Blank(s)	T4d	N2a	M1	T4d	N2a	M1	D	D	Distant	51	Unknown or not applicable	None; diagnosed at autopsy	Surgery performed	999	725	510	40	10	998	9	987	987	987	999	20	Blank(s)	988	5	5	0	9	9	Blank(s)	Yes	No	No	No	Alive	Alive or dead of other cause
70120403	Married (including common law)	54	White	C50.8-Overlapping lesion of breast	Moderately differentiated; Grade II	Left - origin of primary	IIIB	IIIB	Blank(s)	Blank(s)	T4d	N2a	M0	T4d	N2a	M0	RE+RN	RE+RN	Regional	51	Unknown or not applicable	None; diagnosed at autopsy	Surgery performed	120	750	250	0	10	10	5	987	987	0	60	10	Blank(s)	988	1	6	0	13	5	Blank(s)	No	No	No	No	Alive	Alive or dead of other cause
27125651	Married (including common law)	55	White	C50.4-Upper-outer quadrant of breast	Poorly differentiated; Grade III	Right - origin of primary	IIIC	IIIC	Blank(s)	Blank(s)	T4d	N3a	M0	T4d	N3a	M0	RE+RN	RE+RN	Regional	59	Unknown or not applicable	None; diagnosed at autopsy	Surgery performed	35	750	250	0	20	20	26	987	987	0	130	10	Blank(s)	988	3	3	0	34	26	Blank(s)	No	No	No	No	Alive	Alive or dead of other cause
69977145	Married (including common law)	53	White	C50.9-Breast, NOS	Moderately differentiated; Grade II	Left - origin of primary	IIIB	IIIB	Blank(s)	Blank(s)	T4d	N2NOS	M0	T4d	N2NOS	M0	RE+RN	RE+RN	Regional	41	Unknown or not applicable	None; diagnosed at autopsy	Surgery performed	105	750	630	0	20	20	7	987	987	20	40	10	Blank(s)	988	3	3	0	12	7	Blank(s)	No	No	No	No	Alive	Alive or dead of other cause
52125715	Married (including common law)	56	White	C50.9-Breast, NOS	Moderately differentiated; Grade II	Right - origin of primary	IIIB	IIIB	Blank(s)	Blank(s)	T4d	N2a	M0	T4d	N2a	M0	RE+RN	RE+RN	Regional	51	Unknown or not applicable	None; diagnosed at autopsy	Surgery performed	999	750	250	0	10	10	9	987	987	0	60	10	Blank(s)	988	5	6	0	9	9	Blank(s)	No	No	No	No	Alive	Alive or dead of other cause
94980777	Widowed	55	Other (American Indian/AK Native, Asian/Pacific Islander)	C50.9-Breast, NOS	Unknown	Right - origin of primary	IIIB	IIIB	Blank(s)	Blank(s)	T4d	N2NOS	M0	T4d	N2NOS	M0	RE+RN	RE+RN	Regional	43	Unknown or not applicable	None; diagnosed at autopsy	Surgery performed	40	750	620	0	10	20	6	987	987	0	999	10	Blank(s)	988	3	3	0	20	6	Blank(s)	No	No	No	No	Alive	Alive or dead of other cause
80211993	Married (including common law)	52	White	C50.4-Upper-outer quadrant of breast	Moderately differentiated; Grade II	Left - origin of primary	IIIB	IIIB	Blank(s)	Blank(s)	T4d	N2a	M0	T4d	N2a	M0	RE+RN	RE+RN	Regional	44	Unknown or not applicable	None; diagnosed at autopsy	Surgery performed	100	750	250	0	10	10	4	987	987	20	40	10	Blank(s)	988	6	6	0	18	4	Blank(s)	No	No	No	No	Alive	Alive or dead of other cause
52047833	Unknown	52	Other (American Indian/AK Native, Asian/Pacific Islander)	C50.9-Breast, NOS	Poorly differentiated; Grade III	Right - origin of primary	IIIC	IIIC	Blank(s)	Blank(s)	T4d	N3c	M0	T4d	N3c	M0	D	D	Distant	51	Unknown or not applicable	None; diagnosed at autopsy	Surgery performed	998	750	800	0	20	20	98	987	987	987	90	20	Blank(s)	988	3	1	0	0	98	Blank(s)	No	No	No	No	Alive	Alive or dead of other cause
77012543	Married (including common law)	53	White	C50.8-Overlapping lesion of breast	Poorly differentiated; Grade III	Left - origin of primary	IV	IV	Blank(s)	Blank(s)	T4d	N1	M1	T4d	N1	M1	D	D	Distant	51	Unknown or not applicable	None; diagnosed at autopsy	Surgery performed	100	750	255	40	20	20	0	987	987	0	90	20	Blank(s)	988	5	5	0	7	0	Blank(s)	No	No	Yes	No	Breast	Dead (attributable to this cancer dx)
76198706	Unknown	52	White	C50.9-Breast, NOS	Poorly differentiated; Grade III	Left - origin of primary	IV	IV	Blank(s)	Blank(s)	T4d	N2a	M1	T4d	N2a	M1	D	D	Distant	50	Unknown or not applicable	Non-primary surgical procedure to distant lymph node(s)	Surgery performed	65	750	250	50	20	20	4	987	987	20	90	988	Blank(s)	988	6	6	6	8	4	Blank(s)	No	No	No	No	Breast	Dead (attributable to this cancer dx)
92749990	Divorced	53	White	C50.9-Breast, NOS	Poorly differentiated; Grade III	Left - origin of primary	IIIB	IIIB	Blank(s)	Blank(s)	T4d	N1	M0	T4d	N1	M0	RE+RN	RE+RN	Regional	59	Unknown or not applicable	None; diagnosed at autopsy	Surgery performed	15	750	255	0	20	20	0	987	987	0	90	20	Blank(s)	988	5	5	0	9	0	Blank(s)	No	No	No	No	Alive	Alive or dead of other cause
70132753	Married (including common law)	54	White	C50.8-Overlapping lesion of breast	Poorly differentiated; Grade III	Left - origin of primary	IIIB	IIIB	Blank(s)	Blank(s)	T4d	N1	M0	T4d	N1	M0	RE+RN	RE+RN	Regional	59	Unknown or not applicable	None; diagnosed at autopsy	Surgery performed	999	750	600	0	20	20	1	987	987	60	90	10	Blank(s)	988	5	1	0	17	1	Blank(s)	No	No	No	No	Alive	Alive or dead of other cause
80200650	Married (including common law)	52	White	C50.4-Upper-outer quadrant of breast	Unknown	Left - origin of primary	IIIB	IIIB	Blank(s)	Blank(s)	T4d	N0	M0	T4d	N0	M0	RE	RE	Regional	42	Unknown or not applicable	None; diagnosed at autopsy	Surgery performed	999	750	0	0	10	10	98	0	0	0	999	20	Blank(s)	988	0	0	0	0	98	Blank(s)	No	No	No	No	Alive	Alive or dead of other cause
29707610	Divorced	55	White	C50.9-Breast, NOS	Poorly differentiated; Grade III	Left - origin of primary	IIIB	IIIB	Blank(s)	Blank(s)	T4d	N1	M0	T4d	N1	M0	RE+RN	RE+RN	Regional	42	Unknown or not applicable	None; diagnosed at autopsy	Surgery performed	998	750	600	0	20	20	1	987	987	0	130	10	Blank(s)	988	3	1	0	1	1	Blank(s)	No	No	No	No	Alive	Alive or dead of other cause
77129525	Married (including common law)	56	White	C50.9-Breast, NOS	Poorly differentiated; Grade III	Right - origin of primary	IIIB	IIIB	Blank(s)	Blank(s)	T4d	N1	M0	T4d	N1	M0	RE+RN	RE+RN	Regional	41	Unknown or not applicable	None; diagnosed at autopsy	Surgery performed	998	750	255	0	20	20	9	987	987	0	130	20	Blank(s)	988	5	0	0	9	9	Blank(s)	No	No	No	No	Alive	Alive or dead of other cause
81072261	Married (including common law)	53	Black	C50.8-Overlapping lesion of breast	Poorly differentiated; Grade III	Left - origin of primary	IV	IV	Blank(s)	Blank(s)	T4d	N3c	M1	T4d	N3c	M1	D	D	Distant	51	Unknown or not applicable	None; diagnosed at autopsy	Surgery performed	64	750	800	50	10	10	1	987	987	0	90	20	Blank(s)	988	5	5	0	5	1	Blank(s)	Yes	No	Yes	No	Breast	Dead (attributable to this cancer dx)
52979449	Married (including common law)	55	White	C50.8-Overlapping lesion of breast	Poorly differentiated; Grade III	Left - origin of primary	IIIB	IIIB	Blank(s)	Blank(s)	T4d	N1	M0	T4d	N1	M0	RE+RN	RE+RN	Regional	51	Unknown or not applicable	None; diagnosed at autopsy	Surgery performed	998	725	600	0	20	20	95	987	987	50	80	10	Blank(s)	988	5	5	0	25	95	Blank(s)	No	No	No	No	Alive	Alive or dead of other cause
81040848	Divorced	54	White	C50.9-Breast, NOS	Unknown	Left - origin of primary	IV	IV	Blank(s)	Blank(s)	T4d	N3a	M1	T4d	N3a	M1	D	D	Distant	51	Unknown or not applicable	None; diagnosed at autopsy	Surgery performed	70	750	250	60	10	10	21	987	987	0	90	20	Blank(s)	988	6	6	0	22	21	Blank(s)	Yes	No	No	No	Breast	Dead (attributable to this cancer dx)
52098490	Married (including common law)	53	White	C50.1-Central portion of breast	Moderately differentiated; Grade II	Right - origin of primary	IIIB	IIIB	Blank(s)	Blank(s)	T4d	N2NOS	M0	T4d	N2NOS	M0	RE+RN	RE+RN	Regional	51	Unknown or not applicable	None; diagnosed at autopsy	Surgery performed	30	750	610	0	10	10	95	987	987	0	60	10	Blank(s)	988	5	5	0	11	8	Blank(s)	No	No	No	No	Alive	Alive or dead of other cause
51945162	Single (never married)	51	White	C50.8-Overlapping lesion of breast	Poorly differentiated; Grade III	Right - origin of primary	IIIC	IIIC	Blank(s)	Blank(s)	T4d	N3a	M0	T4d	N3a	M0	D	RE+RN	Regional	41	Unknown or not applicable	None; diagnosed at autopsy	Surgery performed	10	750	750	0	10	10	51	987	987	0	90	20	Blank(s)	988	5	6	0	52	52	Blank(s)	No	No	No	No	Breast	Dead (attributable to this cancer dx)
51951208	Married (including common law)	52	White	C50.8-Overlapping lesion of breast	Moderately differentiated; Grade II	Left - origin of primary	IIIC	IIIC	Blank(s)	Blank(s)	T4d	N3a	M0	T4d	N3a	M0	RE+RN	RE+RN	Regional	51	Unknown or not applicable	None; diagnosed at autopsy	Surgery performed	64	750	250	0	10	20	10	987	987	0	90	30	Blank(s)	988	3	3	0	15	10	Blank(s)	No	No	No	No	Breast	Dead (attributable to this cancer dx)
70159180	Married (including common law)	52	White	C50.9-Breast, NOS	Poorly differentiated; Grade III	Left - origin of primary	IIIB	UNK Stage	Blank(s)	Blank(s)	T4d	N0	M0	T4d	N0	MX	RE	RE	Regional	51	Unknown or not applicable	None; diagnosed at autopsy	Surgery performed	51	750	0	99	20	20	0	0	0	987	70	10	Blank(s)	988	5	6	9	10	0	Blank(s)	Unknown	Unknown	Unknown	Unknown	Alive	Alive or dead of other cause
77012917	Married (including common law)	52	White	C50.4-Upper-outer quadrant of breast	Moderately differentiated; Grade II	Left - origin of primary	IIIB	IIIB	Blank(s)	Blank(s)	T4d	N1	M0	T4d	N1	M0	RE+RN	RE+RN	Regional	52	Unknown or not applicable	None; diagnosed at autopsy	Surgery performed	998	750	260	0	10	20	3	987	987	0	120	10	Blank(s)	988	5	5	0	14	3	Blank(s)	No	No	No	No	Alive	Alive or dead of other cause
77115237	Single (never married)	54	White	C50.9-Breast, NOS	Poorly differentiated; Grade III	Right - origin of primary	IV	IV	Blank(s)	Blank(s)	T4d	N3c	M1	T4d	N3c	M1	D	D	Distant	51	Unknown or not applicable	None; diagnosed at autopsy	Surgery performed	998	730	800	10	10	20	0	987	987	0	80	10	Blank(s)	988	5	0	0	1	0	Blank(s)	No	No	No	No	Alive	Alive or dead of other cause
71356013	Married (including common law)	53	White	C50.9-Breast, NOS	Well differentiated; Grade I	Left - origin of primary	IIIB	IIIB	Blank(s)	Blank(s)	T4d	N0	M0	T4d	N0	M0	RE	RE	Regional	41	Unknown or not applicable	None; diagnosed at autopsy	Surgery performed	998	750	0	0	10	10	98	0	0	0	50	20	Blank(s)	988	5	0	0	0	98	Blank(s)	No	No	No	No	Alive	Alive or dead of other cause
12887930	Divorced	52	White	C50.4-Upper-outer quadrant of breast	Poorly differentiated; Grade III	Right - origin of primary	IIIB	IIIB	Blank(s)	Blank(s)	T4d	N1	M0	T4d	N1	M0	RE+RN	RE+RN	Regional	45	Unknown or not applicable	None; diagnosed at autopsy	Surgery performed	32	750	255	0	10	10	95	987	987	0	80	20	Blank(s)	988	5	5	0	3	0	Blank(s)	No	No	No	No	Alive	Alive or dead of other cause
70061852	Divorced	52	Black	C50.9-Breast, NOS	Poorly differentiated; Grade III	Left - origin of primary	IIIB	IIIB	Blank(s)	Blank(s)	T4d	N2NOS	M0	T4d	N2NOS	M0	RE+RN	RE+RN	Regional	52	Unknown or not applicable	None; diagnosed at autopsy	Surgery performed	998	750	620	0	20	20	98	987	987	0	999	10	Blank(s)	988	1	6	0	13	8	Blank(s)	No	No	No	No	Alive	Alive or dead of other cause
70231909	Single (never married)	53	White	C50.8-Overlapping lesion of breast	Unknown	Left - origin of primary	IV	IV	Blank(s)	Blank(s)	T4d	N2a	M1	T4d	N2a	M1	D	D	Distant	51	Unknown or not applicable	None; diagnosed at autopsy	Surgery performed	80	730	510	44	10	20	98	987	987	0	999	10	Blank(s)	988	1	0	0	0	98	Blank(s)	Yes	No	Yes	No	Alive	Alive or dead of other cause
6141793	Single (never married)	53	White	C50.4-Upper-outer quadrant of breast	Unknown	Right - origin of primary	IIIB	IIIB	Blank(s)	Blank(s)	T4d	N0	M0	T4d	N0	M0	RE	RE	Regional	41	Unknown or not applicable	None; diagnosed at autopsy	Surgery performed	30	750	0	0	20	20	98	0	0	0	999	20	Blank(s)	988	5	0	0	0	98	Blank(s)	No	No	No	No	Alive	Alive or dead of other cause
71363312	Divorced	54	White	C50.9-Breast, NOS	Poorly differentiated; Grade III	Left - origin of primary	IIIB	IIIB	Blank(s)	Blank(s)	T4d	N1	M0	T4d	N1	M0	RE+RN	RE+RN	Regional	41	Unknown or not applicable	None; diagnosed at autopsy	Surgery performed	70	730	255	0	10	20	95	987	987	50	80	10	Blank(s)	988	5	5	0	3	95	Blank(s)	No	No	No	No	Alive	Alive or dead of other cause
52080168	Single (never married)	53	White	C50.9-Breast, NOS	Poorly differentiated; Grade III	Right - origin of primary	IIIB	IIIB	Blank(s)	Blank(s)	T4d	N2NOS	M0	T4d	N2NOS	M0	RE+RN	RE+RN	Regional	51	Unknown or not applicable	None; diagnosed at autopsy	Surgery performed	16	750	630	0	20	20	5	987	987	20	999	20	Blank(s)	988	5	3	0	26	5	Blank(s)	No	No	No	No	Breast	Dead (attributable to this cancer dx)
70150846	Married (including common law)	52	White	C50.8-Overlapping lesion of breast	Moderately differentiated; Grade II	Left - origin of primary	IIIB	IIIB	Blank(s)	Blank(s)	T4d	N0(i-)	M0	T4d	N0(i-)	M0	RE	RE	Regional	41	Unknown or not applicable	None; diagnosed at autopsy	Surgery performed	20	725	0	0	10	20	0	1	0	0	70	20	Blank(s)	988	5	5	0	6	0	Blank(s)	No	No	No	No	Alive	Alive or dead of other cause
70090862	Single (never married)	52	Black	C50.9-Breast, NOS	Unknown	Right - origin of primary	IIIB	IIIB	Blank(s)	Blank(s)	T4d	N2a	M0	T4d	N2a	M0	RE+RN	RE+RN	Regional	51	Unknown or not applicable	None; diagnosed at autopsy	Surgery performed	998	750	520	0	10	10	9	987	987	20	70	20	Blank(s)	988	3	6	0	10	9	Blank(s)	No	No	No	No	Breast	Dead (attributable to this cancer dx)
68828265	Single (never married)	50	White	C50.9-Breast, NOS	Poorly differentiated; Grade III	Right - origin of primary	IV	IV	Blank(s)	Blank(s)	T4d	N0	M1	T4d	N0	M1	D	D	Distant	51	Unknown or not applicable	None; diagnosed at autopsy	Surgery performed	50	730	0	44	20	20	98	0	0	0	80	20	Blank(s)	988	6	0	0	0	98	Blank(s)	Yes	No	Yes	Yes	Breast	Dead (attributable to this cancer dx)
81030593	Married (including common law)	52	Black	C50.8-Overlapping lesion of breast	Moderately differentiated; Grade II	Left - origin of primary	IIIB	IIIB	Blank(s)	Blank(s)	T4d	N0	M0	T4d	N0	M0	RE	RE	Regional	50	Unknown or not applicable	None; diagnosed at autopsy	Surgery performed	28	750	0	0	10	10	0	0	0	0	999	20	Blank(s)	988	3	3	0	12	0	Blank(s)	No	No	No	No	Alive	Alive or dead of other cause
53059471	Married (including common law)	54	Other (American Indian/AK Native, Asian/Pacific Islander)	C50.4-Upper-outer quadrant of breast	Unknown	Right - origin of primary	IV	IV	Blank(s)	Blank(s)	T4d	N1a	M1	T4d	N1a	M1	D	D	Distant	50	Unknown or not applicable	None; diagnosed at autopsy	Surgery performed	80	750	250	10	20	20	3	987	987	0	999	10	Blank(s)	988	6	6	0	12	3	Blank(s)	No	No	No	No	Breast	Dead (attributable to this cancer dx)
53078708	Single (never married)	53	White	C50.9-Breast, NOS	Moderately differentiated; Grade II	Right - origin of primary	IIIB	IIIB	Blank(s)	Blank(s)	T4d	N2a	M0	T4d	N2a	M0	RE+RN	RE+RN	Regional	51	Unknown or not applicable	None; diagnosed at autopsy	Surgery performed	999	750	250	0	999	999	4	987	987	60	70	20	Blank(s)	988	5	6	0	6	4	Blank(s)	No	No	No	No	Alive	Alive or dead of other cause
70070920	Single (never married)	52	Black	C50.9-Breast, NOS	Poorly differentiated; Grade III	Left - origin of primary	IIIB	IIIB	Blank(s)	Blank(s)	T4d	N2a	M0	T4d	N2a	M0	RE+RN	RE+RN	Regional	51	Unknown or not applicable	None; diagnosed at autopsy	Surgery performed	50	750	250	0	20	20	5	987	987	0	80	20	Blank(s)	988	5	6	0	6	5	Blank(s)	No	No	No	No	Breast	Dead (attributable to this cancer dx)
77166674	Married (including common law)	52	White	C50.9-Breast, NOS	Poorly differentiated; Grade III	Left - origin of primary	IIIB	IIIB	Blank(s)	Blank(s)	T4d	N1	M0	T4d	N1	M0	RE+RN	RE+RN	Regional	51	Unknown or not applicable	None; diagnosed at autopsy	Surgery performed	999	750	600	0	10	10	4	987	987	0	130	20	Blank(s)	988	5	0	0	15	4	Blank(s)	No	No	No	No	Alive	Alive or dead of other cause
70034401	Married (including common law)	50	White	C50.1-Central portion of breast	Moderately differentiated; Grade II	Right - origin of primary	IIIC	IIIC	Blank(s)	Blank(s)	T4d	N3a	M0	T4d	N3a	M0	D	RE+RN	Regional	51	Unknown or not applicable	None; diagnosed at autopsy	Surgery performed	115	750	750	0	10	10	13	987	987	20	60	20	Blank(s)	988	3	3	0	13	13	Blank(s)	No	No	No	No	Alive	Alive or dead of other cause
93667077	Married (including common law)	49	White	C50.9-Breast, NOS	Moderately differentiated; Grade II	Left - origin of primary	IIIB	IIIB	Blank(s)	Blank(s)	T4d	N1	M0	T4d	N1	M0	RE+RN	RE+RN	Regional	49	Unknown or not applicable	None; diagnosed at autopsy	Surgery performed	998	750	255	0	10	10	98	987	987	20	120	20	Blank(s)	988	0	0	0	0	98	Blank(s)	No	No	No	No	Alive	Alive or dead of other cause
93786466	Single (never married)	50	White	C50.3-Lower-inner quadrant of breast	Poorly differentiated; Grade III	Right - origin of primary	IIIB	IIIB	Blank(s)	Blank(s)	T4d	N1	M0	T4d	N1	M0	RE+RN	RE+RN	Regional	52	Unknown or not applicable	None; diagnosed at autopsy	Surgery performed	80	750	600	0	10	10	1	987	987	0	130	20	Blank(s)	988	1	1	0	1	1	Blank(s)	No	No	No	No	Alive	Alive or dead of other cause
19995222	Married (including common law)	52	Black	C50.4-Upper-outer quadrant of breast	Unknown	Left - origin of primary	IIIC	IIIC	Blank(s)	Blank(s)	T4d	N3c	M0	T4d	N3c	M0	D	D	Distant	51	Unknown or not applicable	None; diagnosed at autopsy	Surgery performed	72	750	800	0	20	20	4	987	987	987	999	10	Blank(s)	988	5	5	0	4	4	Blank(s)	No	No	No	No	Alive	Alive or dead of other cause
69956801	Married (including common law)	50	White	C50.8-Overlapping lesion of breast	Unknown	Left - origin of primary	IIIB	IIIB	Blank(s)	Blank(s)	T4d	N0	M0	T4d	N0	M0	RE	RE	Regional	52	Unknown or not applicable	None; diagnosed at autopsy	Surgery performed	999	750	0	0	10	20	0	0	0	60	999	10	Blank(s)	988	3	6	0	10	0	Blank(s)	No	No	No	No	Alive	Alive or dead of other cause
12995691	Married (including common law)	53	White	C50.9-Breast, NOS	Unknown	Left - origin of primary	IIIB	IIIB	Blank(s)	Blank(s)	T4d	N2a	M0	T4d	N2a	M0	RE+RN	RE+RN	Regional	51	Unknown or not applicable	None; diagnosed at autopsy	Surgery performed	60	730	250	0	10	10	4	987	987	0	70	30	Blank(s)	988	5	6	0	5	4	Blank(s)	No	No	No	No	Alive	Alive or dead of other cause
80209264	Married (including common law)	49	Black	C50.9-Breast, NOS	Moderately differentiated; Grade II	Left - origin of primary	IIIB	IIIB	Blank(s)	Blank(s)	T4d	N0	M0	T4d	N0	M0	RE	RE	Regional	70	Unknown or not applicable	None; diagnosed at autopsy	Surgery performed	999	750	0	0	20	20	98	0	0	0	120	20	Blank(s)	988	1	0	0	0	98	Blank(s)	No	No	No	No	Breast	Dead (attributable to this cancer dx)
69962464	Married (including common law)	50	White	C50.9-Breast, NOS	Poorly differentiated; Grade III	Left - origin of primary	IIIB	IIIB	Blank(s)	Blank(s)	T4d	N2a	M0	T4d	N2a	M0	RE+RN	RE+RN	Regional	51	Unknown or not applicable	None; diagnosed at autopsy	Surgery performed	998	750	250	0	997	997	8	987	987	50	999	997	Blank(s)	988	5	6	0	15	8	Blank(s)	No	No	No	No	Breast	Dead (attributable to this cancer dx)
52073096	Unknown	51	White	C50.4-Upper-outer quadrant of breast	Poorly differentiated; Grade III	Left - origin of primary	IIIB	IIIB	Blank(s)	Blank(s)	T4d	N1	M0	T4d	N1	M0	RE+RN	RE+RN	Regional	41	Unknown or not applicable	None; diagnosed at autopsy	Surgery performed	999	750	255	0	20	20	13	987	987	60	80	10	Blank(s)	988	3	5	0	23	13	Blank(s)	No	No	No	No	Breast	Dead (attributable to this cancer dx)
19975436	Married (including common law)	52	White	C50.4-Upper-outer quadrant of breast	Moderately differentiated; Grade II	Right - origin of primary	IIIB	IIIB	Blank(s)	Blank(s)	T4d	N1	M0	T4d	N1	M0	RE+RN	RE+RN	Regional	52	Unknown or not applicable	None; diagnosed at autopsy	Surgery performed	46	750	600	0	20	10	0	987	987	987	120	20	Blank(s)	988	5	5	0	5	0	Blank(s)	No	No	No	No	Alive	Alive or dead of other cause
70193746	Married (including common law)	50	White	C50.9-Breast, NOS	Moderately differentiated; Grade II	Right - origin of primary	IIIB	IIIB	Blank(s)	Blank(s)	T4d	N2a	M0	T4d	N2a	M0	RE+RN	RE+RN	Regional	51	Unknown or not applicable	None; diagnosed at autopsy	Surgery performed	12	750	600	0	10	10	5	987	987	0	999	20	Blank(s)	988	1	6	0	25	5	Blank(s)	No	No	No	No	Alive	Alive or dead of other cause
44176183	Married (including common law)	50	White	C50.9-Breast, NOS	Moderately differentiated; Grade II	Left - origin of primary	IV	IV	Blank(s)	Blank(s)	T4d	N1a	M1	T4d	N1a	M1	D	D	Distant	51	Unknown or not applicable	None; diagnosed at autopsy	Surgery performed	60	750	250	44	10	20	2	987	987	0	60	20	Blank(s)	988	3	3	0	19	2	Blank(s)	No	No	No	No	Alive	Alive or dead of other cause
77057900	Married (including common law)	50	White	C50.4-Upper-outer quadrant of breast	Poorly differentiated; Grade III	Right - origin of primary	IV	IV	Blank(s)	Blank(s)	T4d	N3a	M1	T4d	N3a	M1	D	D	Distant	51	Unknown or not applicable	None; diagnosed at autopsy	Surgery performed	75	750	600	44	10	20	17	987	987	50	999	10	Blank(s)	988	3	3	0	18	17	Blank(s)	Yes	No	No	No	Alive	Alive or dead of other cause
71450321	Married (including common law)	51	White	C50.8-Overlapping lesion of breast	Poorly differentiated; Grade III	Right - origin of primary	IIIC	IIIC	Blank(s)	Blank(s)	T4d	N3c	M0	T4d	N3c	M0	D	D	Distant	54	Unknown or not applicable	None; diagnosed at autopsy	Surgery performed	70	750	800	0	10	20	4	987	987	50	90	20	Blank(s)	988	5	5	0	13	4	Blank(s)	No	No	No	No	Alive	Alive or dead of other cause
69986529	Married (including common law)	48	Black	C50.9-Breast, NOS	Unknown	Right - origin of primary	IIIB	IIIB	Blank(s)	Blank(s)	T4d	N1NOS	M0	T4d	N1NOS	M0	RE+RN	RE+RN	Regional	80	Unknown or not applicable	None; diagnosed at autopsy	Surgery performed	998	725	250	0	20	20	97	987	987	987	999	20	Blank(s)	988	6	6	0	98	97	Blank(s)	No	No	No	No	Breast	Dead (attributable to this cancer dx)
77121567	Married (including common law)	51	White	C50.4-Upper-outer quadrant of breast	Poorly differentiated; Grade III	Left - origin of primary	IIIB	IIIB	Blank(s)	Blank(s)	T4d	N1	M0	T4d	N1	M0	RE+RN	RE+RN	Regional	52	Unknown or not applicable	None; diagnosed at autopsy	Surgery performed	32	750	255	0	10	20	3	987	987	0	130	20	Blank(s)	988	5	5	0	10	3	Blank(s)	No	No	No	No	Alive	Alive or dead of other cause
71535313	Married (including common law)	51	White	C50.4-Upper-outer quadrant of breast	Poorly differentiated; Grade III	Left - origin of primary	IIIB	IIIB	Blank(s)	Blank(s)	T4d	N1NOS	M0	T4d	N1NOS	M0	RE+RN	RE+RN	Regional	52	Unknown or not applicable	None; diagnosed at autopsy	Surgery performed	43	730	250	0	20	20	95	987	987	50	130	10	Blank(s)	988	5	3	0	14	95	Blank(s)	No	No	No	No	Alive	Alive or dead of other cause
77029203	Married (including common law)	49	White	C50.4-Upper-outer quadrant of breast	Poorly differentiated; Grade III	Left - origin of primary	IIIC	IIIC	Blank(s)	Blank(s)	T4d	N3a	M0	T4d	N3a	M0	D	RE+RN	Regional	51	Unknown or not applicable	None; diagnosed at autopsy	Surgery performed	80	750	750	0	10	10	14	987	987	0	80	20	Blank(s)	988	5	5	0	21	14	Blank(s)	No	No	No	No	Alive	Alive or dead of other cause
77152440	Married (including common law)	49	White	C50.8-Overlapping lesion of breast	Poorly differentiated; Grade III	Right - origin of primary	IIIB	IIIB	Blank(s)	Blank(s)	T4d	N1	M0	T4d	N1	M0	RE+RN	RE+RN	Regional	51	Unknown or not applicable	None; diagnosed at autopsy	Surgery performed	50	750	600	0	998	998	10	987	987	20	70	998	Blank(s)	988	6	0	0	27	10	Blank(s)	No	No	No	No	Alive	Alive or dead of other cause
80212059	Married (including common law)	47	White	C50.9-Breast, NOS	Unknown	Left - origin of primary	IIIB	IIIB	Blank(s)	Blank(s)	T4d	N0	M0	T4d	N0	M0	RE	RE	Regional	51	Unknown or not applicable	None; diagnosed at autopsy	Surgery performed	999	750	0	0	20	20	98	0	0	0	999	30	Blank(s)	988	1	0	0	0	98	Blank(s)	No	No	No	No	Alive	Alive or dead of other cause
98089763	Unknown	46	White	C50.8-Overlapping lesion of breast	Poorly differentiated; Grade III	Left - origin of primary	IIIC	IIIC	Blank(s)	Blank(s)	T4d	N3a	M0	T4d	N3a	M0	RE+RN	RE+RN	Regional	42	Unknown or not applicable	None; diagnosed at autopsy	Surgery performed	32	750	250	0	10	20	29	987	987	20	80	10	Blank(s)	988	3	3	0	33	29	Blank(s)	No	No	No	No	Alive	Alive or dead of other cause
81051130	Married (including common law)	48	White	C50.9-Breast, NOS	Poorly differentiated; Grade III	Right - origin of primary	IIIB	IIIB	Blank(s)	Blank(s)	T4d	N2a	M0	T4d	N2a	M0	RE+RN	RE+RN	Regional	51	Unknown or not applicable	None; diagnosed at autopsy	Surgery performed	998	750	600	0	10	20	7	987	987	0	70	20	Blank(s)	988	6	6	0	20	7	Blank(s)	No	No	No	No	Breast	Dead (attributable to this cancer dx)
27145495	Single (never married)	49	White	C50.9-Breast, NOS	Poorly differentiated; Grade III	Left - origin of primary	IIIC	IIIC	Blank(s)	Blank(s)	T4d	N3a	M0	T4d	N3a	M0	D	RE+RN	Regional	51	Unknown or not applicable	None; diagnosed at autopsy	Surgery performed	998	750	755	0	10	10	10	987	987	0	60	20	Blank(s)	988	5	6	0	13	10	Blank(s)	No	No	No	No	Breast	Dead (attributable to this cancer dx)
70131152	Married (including common law)	47	Other (American Indian/AK Native, Asian/Pacific Islander)	C50.9-Breast, NOS	Poorly differentiated; Grade III	Left - origin of primary	IV	IV	Blank(s)	Blank(s)	T4d	N2a	M1	T4d	N2a	M1	D	D	Distant	42	Unknown or not applicable	Non-primary surgical procedure to distant site	Surgery performed	40	750	250	50	20	20	5	987	987	20	90	20	Blank(s)	988	5	6	6	9	8	Blank(s)	No	Yes	No	No	Breast	Dead (attributable to this cancer dx)
71288454	Married (including common law)	48	White	C50.8-Overlapping lesion of breast	Unknown	Left - origin of primary	IIIB	IIIB	Blank(s)	Blank(s)	T4d	N1a	M0	T4d	N1a	M0	RE+RN	RE+RN	Regional	40	Unknown or not applicable	None; diagnosed at autopsy	Surgery performed	98	750	250	0	10	10	2	987	987	0	999	20	Blank(s)	988	5	6	0	22	5	Blank(s)	No	No	No	No	Breast	Dead (attributable to this cancer dx)
36126972	Separated	49	White	C50.9-Breast, NOS	Unknown	Left - origin of primary	IIIB	IIIB	Blank(s)	Blank(s)	T4d	N1	M0	T4d	N1	M0	RE+RN	RE+RN	Regional	52	Unknown or not applicable	None; diagnosed at autopsy	Surgery performed	999	750	255	0	20	20	95	987	987	987	999	10	Blank(s)	988	5	5	0	14	95	Blank(s)	No	No	No	No	Alive	Alive or dead of other cause
81098450	Unknown	49	White	C50.9-Breast, NOS	Poorly differentiated; Grade III	Left - origin of primary	IIIC	IIIC	Blank(s)	Blank(s)	T4d	N3a	M0	T4d	N3a	M0	RE+RN	RE+RN	Regional	51	Unknown or not applicable	None; diagnosed at autopsy	Surgery performed	998	750	600	0	10	10	10	987	987	0	999	20	Blank(s)	988	6	6	0	12	10	Blank(s)	No	No	No	No	Breast	Dead (attributable to this cancer dx)
98116979	Divorced	47	White	C50.9-Breast, NOS	Poorly differentiated; Grade III	Left - origin of primary	IIIB	IIIB	Blank(s)	Blank(s)	T4d	N1	M0	T4d	N1	M0	RE+RN	RE+RN	Regional	52	Unknown or not applicable	None; diagnosed at autopsy	Surgery performed	999	750	600	0	20	20	1	987	987	0	130	10	Blank(s)	988	5	5	0	14	1	Blank(s)	No	No	No	No	Alive	Alive or dead of other cause
53059780	Married (including common law)	49	White	C50.9-Breast, NOS	Moderately differentiated; Grade II	Left - origin of primary	IIIB	IIIB	Blank(s)	Blank(s)	T4d	N0	M0	T4d	N0	M0	RE	RE	Regional	51	Unknown or not applicable	None; diagnosed at autopsy	Surgery performed	998	750	0	0	20	20	0	0	0	987	70	10	Blank(s)	988	5	6	0	8	0	Blank(s)	No	No	No	No	Alive	Alive or dead of other cause
5410199	Married (including common law)	47	White	C50.9-Breast, NOS	Unknown	Right - origin of primary	IV	IV	Blank(s)	Blank(s)	T4d	N3NOS	M1	T4d	N3NOS	M1	D	D	Distant	41	Unknown or not applicable	None; diagnosed at autopsy	Surgery performed	140	750	815	40	10	10	11	987	987	50	999	20	Blank(s)	988	3	3	0	12	11	Blank(s)	No	No	No	No	Breast	Dead (attributable to this cancer dx)
92731878	Married (including common law)	45	White	C50.8-Overlapping lesion of breast	Poorly differentiated; Grade III	Bilateral, single primary	IV	IV	Blank(s)	Blank(s)	T4d	N0	M1	T4d	N0	M1	D	D	Distant	42	Unknown or not applicable	Non-primary surgical procedure to distant site	Surgery performed	999	750	0	44	10	10	0	0	0	0	90	30	Blank(s)	988	6	6	0	6	0	Blank(s)	Yes	No	No	No	Breast	Dead (attributable to this cancer dx)
71402869	Single (never married)	48	White	C50.9-Breast, NOS	Poorly differentiated; Grade III	Left - origin of primary	IIIB	IIIB	Blank(s)	Blank(s)	T4d	N2a	M0	T4d	N2a	M0	RE+RN	RE+RN	Regional	51	Unknown or not applicable	None; diagnosed at autopsy	Surgery performed	33	750	510	0	10	20	98	987	987	0	90	20	Blank(s)	988	5	0	0	0	98	Blank(s)	No	No	No	No	State DC not available or state DC available but no COD	Alive or dead of other cause
81116574	Married (including common law)	49	White	C50.8-Overlapping lesion of breast	Poorly differentiated; Grade III	Left - origin of primary	IIIB	IIIB	Blank(s)	Blank(s)	T4d	N1	M0	T4d	N1	M0	RE+RN	RE+RN	Regional	52	Unknown or not applicable	None; diagnosed at autopsy	Surgery performed	35	750	600	0	10	10	95	987	987	0	80	10	Blank(s)	988	5	1	0	9	0	Blank(s)	No	No	No	No	Alive	Alive or dead of other cause
12931754	Single (never married)	47	Black	C50.5-Lower-outer quadrant of breast	Unknown	Left - origin of primary	IIIB	IIIB	Blank(s)	Blank(s)	T4d	N1a	M0	T4d	N1a	M0	RE+RN	RE+RN	Regional	54	Unknown or not applicable	None; diagnosed at autopsy	Surgery performed	15	750	250	0	20	20	2	987	987	50	999	10	Blank(s)	988	5	3	0	5	2	Blank(s)	No	No	No	No	Alive	Alive or dead of other cause
12973433	Unknown	47	White	C50.9-Breast, NOS	Unknown	Right - origin of primary	IIIC	IIIC	Blank(s)	Blank(s)	T4d	N3NOS	M0	T4d	N3NOS	M0	RE+RN	RE+RN	Regional	52	Unknown or not applicable	Non-primary surgical procedure performed	Surgery performed	110	750	815	0	10	10	99	987	987	20	999	10	Blank(s)	988	5	6	0	7	7	Blank(s)	No	No	No	No	Alive	Alive or dead of other cause
52115202	Married (including common law)	46	White	C50.9-Breast, NOS	Moderately differentiated; Grade II	Right - origin of primary	IIIB	IIIB	Blank(s)	Blank(s)	T4d	N1	M0	T4d	N1	M0	RE+RN	RE+RN	Regional	50	Unknown or not applicable	None; diagnosed at autopsy	Surgery performed	31	750	260	0	10	10	0	987	987	40	50	20	Blank(s)	988	5	5	0	11	3	Blank(s)	No	No	No	No	Alive	Alive or dead of other cause
98085860	Single (never married)	44	White	C50.1-Central portion of breast	Poorly differentiated; Grade III	Right - origin of primary	IIIC	IIIC	Blank(s)	Blank(s)	T4d	N3a	M0	T4d	N3a	M0	RE+RN	RE+RN	Regional	51	Unknown or not applicable	None; diagnosed at autopsy	Surgery performed	50	750	600	0	20	20	10	987	987	0	130	10	Blank(s)	988	3	3	0	12	10	Blank(s)	No	No	No	No	Miscellaneous Malignant Cancer	Dead (attributable to this cancer dx)
81068656	Single (never married)	46	Black	C50.8-Overlapping lesion of breast	Unknown	Right - origin of primary	IV	IV	Blank(s)	Blank(s)	T4d	N1a	M1	T4d	N1a	M1	D	D	Distant	41	Unknown or not applicable	None; diagnosed at autopsy	Surgery performed	130	750	250	44	20	20	3	987	987	0	130	20	Blank(s)	988	6	6	1	3	3	Blank(s)	No	No	No	Yes	Breast	Dead (attributable to this cancer dx)
77057249	Married (including common law)	46	White	C50.9-Breast, NOS	Moderately differentiated; Grade II	Left - origin of primary	IIIC	IIIC	Blank(s)	Blank(s)	T4d	N3b	M0	T4d	N3b	M0	RE+RN	RE+RN	Regional	41	Unknown or not applicable	None; diagnosed at autopsy	Surgery performed	77	725	763	0	10	10	95	987	987	30	60	20	Blank(s)	988	5	5	0	1	95	Blank(s)	No	No	No	No	Alive	Alive or dead of other cause
42515458	Single (never married)	47	Other (American Indian/AK Native, Asian/Pacific Islander)	C50.4-Upper-outer quadrant of breast	Poorly differentiated; Grade III	Left - origin of primary	IIIB	IIIB	Blank(s)	Blank(s)	T4d	N1NOS	M0	T4d	N1NOS	M0	RE+RN	RE+RN	Regional	52	Unknown or not applicable	Non-primary surgical procedure performed	Surgery performed	40	750	258	0	10	10	1	987	987	0	999	20	Blank(s)	988	1	6	0	2	1	Blank(s)	No	No	No	No	Alive	Alive or dead of other cause
72662285	Married (including common law)	47	Other (American Indian/AK Native, Asian/Pacific Islander)	C50.0-Nipple	Poorly differentiated; Grade III	Left - origin of primary	IIIB	IIIB	Blank(s)	Blank(s)	T4d	N0(i-)	M0	T4d	N0(i-)	M0	RE	RE	Regional	44	Unknown or not applicable	None; diagnosed at autopsy	Surgery performed	42	750	0	0	10	10	0	1	0	20	80	20	Blank(s)	988	3	3	0	3	0	Blank(s)	No	No	No	No	Alive	Alive or dead of other cause
81095500	Single (never married)	47	Black	C50.4-Upper-outer quadrant of breast	Unknown	Right - origin of primary	IIIB	IIIB	Blank(s)	Blank(s)	T4d	N1	M0	T4d	N1	M0	RE+RN	RE+RN	Regional	51	Unknown or not applicable	None; diagnosed at autopsy	Surgery performed	45	750	600	0	20	20	95	987	987	0	999	20	Blank(s)	988	5	5	0	95	95	Blank(s)	No	No	No	No	Breast	Dead (attributable to this cancer dx)
36079747	Married (including common law)	47	White	C50.9-Breast, NOS	Moderately differentiated; Grade II	Left - origin of primary	IIIB	IIIB	Blank(s)	Blank(s)	T4d	N1a	M0	T4d	N1a	M0	RE+RN	RE+RN	Regional	51	Unknown or not applicable	None; diagnosed at autopsy	Surgery performed	999	750	250	0	10	10	3	987	987	60	60	20	Blank(s)	988	5	6	0	3	3	Blank(s)	No	No	No	No	Alive	Alive or dead of other cause
71342540	Married (including common law)	47	White	C50.9-Breast, NOS	Poorly differentiated; Grade III	Left - origin of primary	IIIC	IIIC	Blank(s)	Blank(s)	T4d	N3a	M0	T4d	N3a	M0	RE+RN	RE+RN	Regional	51	Unknown or not applicable	None; diagnosed at autopsy	Surgery performed	998	750	600	0	20	20	15	987	987	0	80	20	Blank(s)	988	3	3	0	34	15	Blank(s)	No	No	No	No	Breast	Dead (attributable to this cancer dx)
72692109	Married (including common law)	48	White	C50.9-Breast, NOS	Poorly differentiated; Grade III	Right - origin of primary	IIIB	IIIB	Blank(s)	Blank(s)	T4d	N0	M0	T4d	N0	M0	RE	RE	Regional	41	Unknown or not applicable	None; diagnosed at autopsy	Surgery performed	998	750	0	0	20	20	98	0	0	987	90	20	Blank(s)	988	5	0	0	0	98	Blank(s)	No	No	No	No	Alive	Alive or dead of other cause
53051727	Married (including common law)	47	White	C50.1-Central portion of breast	Moderately differentiated; Grade II	Right - origin of primary	IIIC	IIIC	Blank(s)	Blank(s)	T4d	N3a	M0	T4d	N3a	M0	RE+RN	RE+RN	Regional	51	Unknown or not applicable	None; diagnosed at autopsy	Surgery performed	50	750	600	0	10	10	13	987	987	50	70	30	Blank(s)	988	3	3	9	13	13	Blank(s)	No	No	No	No	Alive	Alive or dead of other cause
71557470	Divorced	46	Black	C50.8-Overlapping lesion of breast	Poorly differentiated; Grade III	Left - origin of primary	IV	IV	Blank(s)	Blank(s)	T4d	N1a	M1	T4d	N1a	M1	D	D	Distant	50	Unknown or not applicable	None; diagnosed at autopsy	Surgery performed	8	750	600	40	10	10	2	987	987	0	80	10	Blank(s)	988	5	6	0	12	2	Blank(s)	Yes	No	Yes	No	Alive	Alive or dead of other cause
53012116	Married (including common law)	47	White	C50.9-Breast, NOS	Unknown	Right - origin of primary	IIIB	IIIB	Blank(s)	Blank(s)	T4d	N2a	M0	T4d	N2a	M0	RE+RN	RE+RN	Regional	51	Unknown or not applicable	None; diagnosed at autopsy	Surgery performed	999	750	250	0	20	20	4	987	987	0	999	20	Blank(s)	988	5	6	0	5	4	Blank(s)	No	No	No	No	Alive	Alive or dead of other cause
12995213	Married (including common law)	47	White	C50.9-Breast, NOS	Poorly differentiated; Grade III	Left - origin of primary	IV	IV	Blank(s)	Blank(s)	T4d	N1	M1	T4d	N1	M1	D	D	Distant	51	Unknown or not applicable	Non-primary surgical procedure to distant site	Surgery performed	999	750	257	44	10	10	0	987	987	60	130	10	Blank(s)	988	5	5	5	12	0	Blank(s)	No	No	No	Yes	Alive	Alive or dead of other cause
5409319	Married (including common law)	44	White	C50.8-Overlapping lesion of breast	Poorly differentiated; Grade III	Right - origin of primary	IIIB	IIIB	Blank(s)	Blank(s)	T4d	N2a	M0	T4d	N2a	M0	RE+RN	RE+RN	Regional	51	Unknown or not applicable	None; diagnosed at autopsy	Surgery performed	55	750	250	0	10	20	7	987	987	20	90	20	Blank(s)	988	6	6	0	13	10	Blank(s)	No	No	No	No	Alive	Alive or dead of other cause
52979894	Married (including common law)	46	White	C50.9-Breast, NOS	Unknown	Left - origin of primary	IIIB	IIIB	Blank(s)	Blank(s)	T4d	N0	M0	T4d	N0	M0	RE	RE	Regional	61	Unknown or not applicable	None; diagnosed at autopsy	Surgery performed	999	750	0	0	20	20	0	0	0	60	999	10	Blank(s)	988	5	3	0	14	0	Blank(s)	No	No	No	No	Breast	Dead (attributable to this cancer dx)
29697277	Married (including common law)	44	White	C50.3-Lower-inner quadrant of breast	Poorly differentiated; Grade III	Right - origin of primary	IV	IV	Blank(s)	Blank(s)	T4d	N3a	M1	T4d	N3a	M1	D	D	Distant	51	Unknown or not applicable	None; diagnosed at autopsy	Surgery performed	60	750	750	44	10	10	17	987	987	20	130	10	Blank(s)	988	5	6	3	23	17	Blank(s)	Yes	No	No	No	Alive	Alive or dead of other cause
41452313	Married (including common law)	43	Black	C50.8-Overlapping lesion of breast	Poorly differentiated; Grade III	Left - origin of primary	IIIB	IIIB	Blank(s)	Blank(s)	T4d	N2NOS	M0	T4d	N2NOS	M0	RE+RN	RE+RN	Regional	51	Unknown or not applicable	None; diagnosed at autopsy	Surgery performed	35	750	610	0	20	20	95	987	987	0	999	20	Blank(s)	988	5	5	0	12	95	Blank(s)	No	No	No	No	Alive	Alive or dead of other cause
52049573	Married (including common law)	43	White	C50.4-Upper-outer quadrant of breast	Moderately differentiated; Grade II	Right - origin of primary	IV	IV	Blank(s)	Blank(s)	T4d	N2a	M1	T4d	N2a	M1	D	D	Distant	52	Unknown or not applicable	Non-primary surgical procedure to other regional sites	Surgery performed	30	750	250	40	20	20	6	987	987	0	70	10	Blank(s)	988	1	6	0	31	6	Blank(s)	No	No	No	No	Alive	Alive or dead of other cause
77144660	Divorced	45	White	C50.8-Overlapping lesion of breast	Poorly differentiated; Grade III	Right - origin of primary	IIIB	IIIB	Blank(s)	Blank(s)	T4d	N0	M0	T4d	N0	M0	RE	RE	Regional	52	Unknown or not applicable	None; diagnosed at autopsy	Surgery performed	999	750	0	0	20	20	0	0	0	60	999	10	Blank(s)	988	5	6	0	14	0	Blank(s)	No	No	No	No	Alive	Alive or dead of other cause
70054077	Married (including common law)	44	White	C50.8-Overlapping lesion of breast	Moderately differentiated; Grade II	Left - origin of primary	IIIB	IIIB	Blank(s)	Blank(s)	T4d	N0	M0	T4d	N0	M0	RE	RE	Regional	49	Unknown or not applicable	None; diagnosed at autopsy	Surgery performed	30	725	0	0	10	10	0	0	0	0	60	10	Blank(s)	988	6	6	0	23	0	Blank(s)	No	No	No	No	Alive	Alive or dead of other cause
27076762	Single (never married)	42	White	C50.9-Breast, NOS	Poorly differentiated; Grade III	Right - origin of primary	IV	IV	Blank(s)	Blank(s)	T4d	N3c	M1	T4d	N3c	M1	D	D	Distant	52	Unknown or not applicable	None; diagnosed at autopsy	Surgery performed	45	750	800	10	20	20	2	987	987	987	90	988	Blank(s)	988	5	5	0	2	2	Blank(s)	No	No	No	No	Breast	Dead (attributable to this cancer dx)
12991809	Single (never married)	43	White	C50.9-Breast, NOS	Poorly differentiated; Grade III	Left - origin of primary	IIIB	IIIB	Blank(s)	Blank(s)	T4d	N1	M0	T4d	N1	M0	RE+RN	RE+RN	Regional	50	Unknown or not applicable	None; diagnosed at autopsy	Surgery performed	999	750	255	0	20	20	95	987	987	0	80	10	Blank(s)	988	3	5	0	14	0	Blank(s)	No	No	No	No	Alive	Alive or dead of other cause
68860644	Single (never married)	40	White	C50.8-Overlapping lesion of breast	Poorly differentiated; Grade III	Right - origin of primary	IV	IV	Blank(s)	Blank(s)	T4d	N0	M1	T4d	N0	M1	D	D	Distant	51	Unknown or not applicable	None; diagnosed at autopsy	Surgery performed	998	730	0	40	10	20	0	0	0	0	80	10	Blank(s)	988	1	5	0	16	0	Blank(s)	No	No	No	Yes	Alive	Alive or dead of other cause
53051364	Married (including common law)	43	White	C50.9-Breast, NOS	Poorly differentiated; Grade III	Left - origin of primary	IIIB	IIIB	Blank(s)	Blank(s)	T4d	N1	M0	T4d	N1	M0	RE+RN	RE+RN	Regional	52	Unknown or not applicable	None; diagnosed at autopsy	Surgery performed	998	730	255	0	10	20	95	987	987	50	90	10	Blank(s)	988	5	5	0	9	95	Blank(s)	No	No	No	No	Alive	Alive or dead of other cause
12932845	Divorced	41	Black	C50.8-Overlapping lesion of breast	Poorly differentiated; Grade III	Left - origin of primary	IIIB	IIIB	Blank(s)	Blank(s)	T4d	N1a	M0	T4d	N1a	M0	RE+RN	RE+RN	Regional	51	Unknown or not applicable	None; diagnosed at autopsy	Surgery performed	999	750	250	0	10	20	2	987	987	987	80	10	Blank(s)	988	5	6	0	12	2	Blank(s)	No	No	No	No	Alive	Alive or dead of other cause
70119044	Married (including common law)	41	White	C50.5-Lower-outer quadrant of breast	Poorly differentiated; Grade III	Right - origin of primary	IIIB	IIIB	Blank(s)	Blank(s)	T4d	N1	M0	T4d	N1	M0	RE+RN	RE+RN	Regional	51	Unknown or not applicable	None; diagnosed at autopsy	Surgery performed	120	750	255	0	20	20	95	987	987	0	999	20	Blank(s)	988	0	5	0	6	95	Blank(s)	No	No	No	No	Alive	Alive or dead of other cause
41449067	Unknown	39	White	C50.4-Upper-outer quadrant of breast	Poorly differentiated; Grade III	Right - origin of primary	IIIB	IIIB	Blank(s)	Blank(s)	T4d	N2NOS	M0	T4d	N2NOS	M0	RE+RN	RE+RN	Regional	42	Unknown or not applicable	None; diagnosed at autopsy	Surgery performed	113	750	610	0	20	20	1	987	987	20	90	10	Blank(s)	988	6	5	0	5	1	Blank(s)	No	No	No	No	Breast	Dead (attributable to this cancer dx)
77075217	Married (including common law)	40	White	C50.3-Lower-inner quadrant of breast	Poorly differentiated; Grade III	Left - origin of primary	IIIB	IIIB	Blank(s)	Blank(s)	T4d	N1	M0	T4d	N1	M0	RE+RN	RE+RN	Regional	52	Unknown or not applicable	None; diagnosed at autopsy	Surgery performed	40	750	255	0	10	10	0	987	987	987	999	10	Blank(s)	988	5	5	0	20	0	Blank(s)	No	No	No	No	Alive	Alive or dead of other cause
92754942	Single (never married)	39	Black	C50.6-Axillary tail of breast	Unknown	Left - origin of primary	IIIB	IIIB	Blank(s)	Blank(s)	T4d	N1	M0	T4d	N1	M0	RE+RN	RE+RN	Regional	52	Unknown or not applicable	None; diagnosed at autopsy	Surgery performed	999	750	260	0	20	20	1	987	987	0	999	20	Blank(s)	988	5	5	0	8	1	Blank(s)	No	No	No	No	Breast	Dead (attributable to this cancer dx)
98181044	Married (including common law)	39	White	C50.8-Overlapping lesion of breast	Poorly differentiated; Grade III	Left - origin of primary	IIIB	IIIB	Blank(s)	Blank(s)	T4d	N2a	M0	T4d	N2a	M0	RE+RN	RE+RN	Regional	51	Unknown or not applicable	None; diagnosed at autopsy	Surgery performed	17	750	520	0	10	10	6	987	987	0	80	20	Blank(s)	988	6	3	0	16	6	Blank(s)	No	No	No	No	Alive	Alive or dead of other cause
38207290	Married (including common law)	41	White	C50.1-Central portion of breast	Unknown	Right - origin of primary	IIIB	IIIB	Blank(s)	Blank(s)	T4d	N0(i-)	M0	T4d	N0(i-)	M0	RE	RE	Regional	57	Unknown or not applicable	None; diagnosed at autopsy	Surgery performed	999	750	0	0	20	20	0	1	1	60	999	10	Blank(s)	988	5	5	0	31	0	Blank(s)	No	No	No	No	Alive	Alive or dead of other cause
77002166	Married (including common law)	39	White	C50.4-Upper-outer quadrant of breast	Poorly differentiated; Grade III	Left - origin of primary	IIIB	IIIB	Blank(s)	Blank(s)	T4d	N1	M0	T4d	N1	M0	RE+RN	RE+RN	Regional	54	Unknown or not applicable	Non-primary surgical procedure performed	Surgery performed	130	750	600	0	20	20	28	987	987	20	999	20	Blank(s)	988	5	5	0	28	28	Blank(s)	No	No	No	No	Breast	Dead (attributable to this cancer dx)
99001154	Married (including common law)	40	White	C50.9-Breast, NOS	Poorly differentiated; Grade III	Right - origin of primary	IIIB	IIIB	Blank(s)	Blank(s)	T4d	N1	M0	T4d	N1	M0	RE+RN	RE+RN	Regional	52	Unknown or not applicable	None; diagnosed at autopsy	Surgery performed	63	750	255	0	10	10	0	987	987	987	90	10	Blank(s)	988	5	5	0	16	0	Blank(s)	No	No	No	No	Alive	Alive or dead of other cause
93829578	Single (never married)	39	Black	C50.9-Breast, NOS	Unknown	Right - origin of primary	IIIB	IIIB	Blank(s)	Blank(s)	T4d	N1mi	M0	T4d	N1mi	M0	RE+RN	RE+RN	Regional	51	Unknown or not applicable	None; diagnosed at autopsy	Surgery performed	998	750	150	0	10	20	7	987	987	0	130	20	Blank(s)	988	3	3	0	7	7	Blank(s)	No	No	No	No	Breast	Dead (attributable to this cancer dx)
77129014	Married (including common law)	40	White	C50.4-Upper-outer quadrant of breast	Poorly differentiated; Grade III	Right - origin of primary	IIIB	IIIB	Blank(s)	Blank(s)	T4d	N1a	M0	T4d	N1a	M0	RE+RN	RE+RN	Regional	51	Unknown or not applicable	None; diagnosed at autopsy	Surgery performed	32	750	250	0	20	20	2	987	987	40	999	20	Blank(s)	988	6	3	0	9	2	Blank(s)	No	No	No	No	Breast	Dead (attributable to this cancer dx)
77019175	Married (including common law)	38	White	C50.4-Upper-outer quadrant of breast	Poorly differentiated; Grade III	Left - origin of primary	IIIB	IIIB	Blank(s)	Blank(s)	T4d	N2NOS	M0	T4d	N2NOS	M0	RE+RN	RE+RN	Regional	42	Unknown or not applicable	None; diagnosed at autopsy	Surgery performed	35	750	630	0	10	10	97	987	987	987	130	10	Blank(s)	988	1	1	0	98	97	Blank(s)	No	No	No	No	Alive	Alive or dead of other cause
98124584	Married (including common law)	38	White	C50.9-Breast, NOS	Poorly differentiated; Grade III	Right - origin of primary	IIIC	IIIC	Blank(s)	Blank(s)	T4d	N3a	M0	T4d	N3a	M0	RE+RN	RE+RN	Regional	41	Unknown or not applicable	None; diagnosed at autopsy	Surgery performed	85	750	600	0	20	10	18	987	987	20	90	20	Blank(s)	988	3	3	0	31	18	Blank(s)	No	No	No	No	Alive	Alive or dead of other cause
29719602	Single (never married)	41	White	C50.9-Breast, NOS	Moderately differentiated; Grade II	Right - origin of primary	IIIB	IIIB	Blank(s)	Blank(s)	T4d	N1	M0	T4d	N1	M0	RE+RN	RE+RN	Regional	51	Unknown or not applicable	None; diagnosed at autopsy	Surgery performed	998	750	600	0	10	10	98	987	987	50	70	20	Blank(s)	988	3	0	0	0	98	Blank(s)	No	No	No	No	Alive	Alive or dead of other cause
68814280	Married (including common law)	37	Other (American Indian/AK Native, Asian/Pacific Islander)	C50.9-Breast, NOS	Poorly differentiated; Grade III	Left - origin of primary	IV	IV	Blank(s)	Blank(s)	T4d	N2a	M1	T4d	N2a	M1	D	D	Distant	41	Unknown or not applicable	None; diagnosed at autopsy	Surgery performed	100	750	250	44	10	10	4	987	987	30	80	20	Blank(s)	988	5	6	0	7	4	Blank(s)	Yes	No	No	No	Alive	Alive or dead of other cause
81104521	Single (never married)	39	Black	C50.2-Upper-inner quadrant of breast	Poorly differentiated; Grade III	Left - origin of primary	IIIB	IIIB	Blank(s)	Blank(s)	T4d	N1	M0	T4d	N1	M0	RE+RN	RE+RN	Regional	41	Unknown or not applicable	None; diagnosed at autopsy	Surgery performed	6	750	600	0	20	20	1	987	987	50	80	10	Blank(s)	988	6	5	0	11	1	Blank(s)	No	No	No	No	Alive	Alive or dead of other cause
38132404	Divorced	37	White	C50.8-Overlapping lesion of breast	Poorly differentiated; Grade III	Left - origin of primary	IIIB	IIIB	Blank(s)	Blank(s)	T4d	N1	M0	T4d	N1	M0	RE+RN	RE+RN	Regional	57	Unknown or not applicable	None; diagnosed at autopsy	Surgery performed	25	750	600	0	20	20	1	987	987	987	999	20	Blank(s)	988	5	5	0	17	1	Blank(s)	No	No	No	No	Alive	Alive or dead of other cause
19982563	Single (never married)	37	White	C50.8-Overlapping lesion of breast	Poorly differentiated; Grade III	Left - origin of primary	IIIB	IIIB	Blank(s)	Blank(s)	T4d	N1	M0	T4d	N1	M0	RE+RN	RE+RN	Regional	51	Unknown or not applicable	None; diagnosed at autopsy	Surgery performed	40	750	260	0	10	20	95	987	987	987	999	10	Blank(s)	988	5	5	0	1	0	Blank(s)	No	No	No	No	Alive	Alive or dead of other cause
71370433	Separated	37	Other (American Indian/AK Native, Asian/Pacific Islander)	C50.4-Upper-outer quadrant of breast	Poorly differentiated; Grade III	Right - origin of primary	IIIB	IIIB	Blank(s)	Blank(s)	T4d	N2a	M0	T4d	N2a	M0	RE+RN	RE+RN	Regional	51	Unknown or not applicable	None; diagnosed at autopsy	Surgery performed	105	725	510	0	20	20	0	987	987	50	90	20	Blank(s)	988	5	5	0	6	0	Blank(s)	No	No	No	No	Breast	Dead (attributable to this cancer dx)
71525306	Married (including common law)	38	White	C50.9-Breast, NOS	Unknown	Left - origin of primary	IV	IV	Blank(s)	Blank(s)	T4d	N3c	M1	T4d	N3c	M1	D	D	Distant	51	Unknown or not applicable	None; diagnosed at autopsy	Surgery performed	999	750	800	40	20	20	7	987	987	0	80	20	Blank(s)	988	5	5	0	11	7	Blank(s)	Yes	No	No	No	Miscellaneous Malignant Cancer	Dead (attributable to this cancer dx)
71348724	Married (including common law)	37	White	C50.9-Breast, NOS	Moderately differentiated; Grade II	Right - origin of primary	IIIB	IIIB	Blank(s)	Blank(s)	T4d	N1	M0	T4d	N1	M0	RE+RN	RE+RN	Regional	51	Unknown or not applicable	None; diagnosed at autopsy	Surgery performed	998	750	257	0	20	20	0	987	987	0	999	10	Blank(s)	988	5	5	0	12	0	Blank(s)	No	No	No	No	Alive	Alive or dead of other cause
29748576	Married (including common law)	36	White	C50.1-Central portion of breast	Moderately differentiated; Grade II	Left - origin of primary	IIIB	IIIB	Blank(s)	Blank(s)	T4d	N2a	M0	T4d	N2a	M0	RE+RN	RE+RN	Regional	51	Unknown or not applicable	None; diagnosed at autopsy	Surgery performed	9	750	600	0	10	10	6	987	987	20	70	20	Blank(s)	988	6	6	0	10	6	Blank(s)	No	No	No	No	Alive	Alive or dead of other cause
72681706	Single (never married)	37	White	C50.9-Breast, NOS	Unknown	Right - origin of primary	IIIB	IIIB	Blank(s)	Blank(s)	T4d	N0	M0	T4d	N0	M0	RE	RE	Regional	42	Unknown or not applicable	None; diagnosed at autopsy	Surgery performed	999	750	0	0	10	10	0	0	0	0	999	20	Blank(s)	988	5	5	0	1	0	Blank(s)	No	No	No	No	Alive	Alive or dead of other cause
94861945	Married (including common law)	37	White	C50.9-Breast, NOS	Poorly differentiated; Grade III	Left - origin of primary	IIIB	IIIB	Blank(s)	Blank(s)	T4d	N1NOS	M0	T4d	N1NOS	M0	RE+RN	RE+RN	Regional	44	Unknown or not applicable	None; diagnosed at autopsy	Surgery performed	135	750	258	0	20	10	1	987	987	0	130	20	Blank(s)	988	0	3	0	2	1	Blank(s)	No	No	No	No	Alive	Alive or dead of other cause
22130903	Married (including common law)	34	White	C50.9-Breast, NOS	Moderately differentiated; Grade II	Left - origin of primary	IIIC	IIIC	Blank(s)	Blank(s)	T4d	N3b	M0	T4d	N3b	M0	RE+RN	RE+RN	Regional	52	Unknown or not applicable	None; diagnosed at autopsy	Surgery performed	998	725	763	0	10	10	95	987	987	987	999	20	Blank(s)	988	5	5	0	16	0	Blank(s)	No	No	No	No	Alive	Alive or dead of other cause
35229758	Married (including common law)	34	Other (American Indian/AK Native, Asian/Pacific Islander)	C50.8-Overlapping lesion of breast	Poorly differentiated; Grade III	Right - origin of primary	IIIB	IIIB	Blank(s)	Blank(s)	T4d	N1	M0	T4d	N1	M0	RE+RN	RE+RN	Regional	51	Unknown or not applicable	None; diagnosed at autopsy	Surgery performed	100	750	257	0	20	20	1	987	987	987	80	10	Blank(s)	988	5	5	0	21	1	Blank(s)	No	No	No	No	Alive	Alive or dead of other cause
12882854	Married (including common law)	34	White	C50.4-Upper-outer quadrant of breast	Moderately differentiated; Grade II	Left - origin of primary	IIIB	IIIB	Blank(s)	Blank(s)	T4d	N1	M0	T4d	N1	M0	RE+RN	RE+RN	Regional	50	Unknown or not applicable	None; diagnosed at autopsy	Surgery performed	44	750	255	0	10	10	7	987	987	50	70	20	Blank(s)	988	6	5	0	10	7	Blank(s)	No	No	No	No	Alive	Alive or dead of other cause
69939807	Married (including common law)	34	White	C50.9-Breast, NOS	Unknown	Left - origin of primary	IIIB	IIIB	Blank(s)	Blank(s)	T4d	N1	M0	T4d	N1	M0	RE+RN	RE+RN	Regional	52	Unknown or not applicable	None; diagnosed at autopsy	Surgery performed	999	725	600	0	10	20	0	987	987	987	999	20	Blank(s)	988	5	5	0	16	0	Blank(s)	No	No	No	No	Alive	Alive or dead of other cause
52950263	Single (never married)	37	Black	C50.4-Upper-outer quadrant of breast	Unknown	Left - origin of primary	IIIB	IIIB	Blank(s)	Blank(s)	T4d	N0	M0	T4d	N0	M0	RE	RE	Regional	49	Unknown or not applicable	None; diagnosed at autopsy	Surgery performed	33	750	0	0	10	10	98	0	0	987	70	20	Blank(s)	988	5	0	0	0	98	Blank(s)	No	No	No	No	Alive	Alive or dead of other cause
6184441	Married (including common law)	37	White	C50.8-Overlapping lesion of breast	Poorly differentiated; Grade III	Right - origin of primary	IIIB	IIIB	Blank(s)	Blank(s)	T4d	N0	M0	T4d	N0	M0	RE	RE	Regional	51	Unknown or not applicable	None; diagnosed at autopsy	Surgery performed	80	750	0	0	20	20	0	0	0	0	90	20	Blank(s)	988	6	6	0	1	0	Blank(s)	No	No	No	No	Breast	Dead (attributable to this cancer dx)
93809385	Single (never married)	34	Black	C50.9-Breast, NOS	Poorly differentiated; Grade III	Right - origin of primary	IV	IV	Blank(s)	Blank(s)	T4d	N1	M1	T4d	N1	M1	D	D	Distant	80	Unknown or not applicable	Unknown; death certificate only	Surgery performed	998	730	255	44	10	10	95	987	987	20	999	20	Blank(s)	988	5	1	0	95	95	Blank(s)	No	No	Yes	No	Breast	Dead (attributable to this cancer dx)
12877558	Single (never married)	32	Other (American Indian/AK Native, Asian/Pacific Islander)	C50.9-Breast, NOS	Poorly differentiated; Grade III	Right - origin of primary	IIIB	IIIB	Blank(s)	Blank(s)	T4d	N2NOS	M0	T4d	N2NOS	M0	RE+RN	RE+RN	Regional	50	Unknown or not applicable	None; diagnosed at autopsy	Surgery performed	56	730	610	0	20	20	98	987	987	0	130	20	Blank(s)	988	1	1	0	0	98	Blank(s)	No	No	No	No	Alive	Alive or dead of other cause
99032434	Married (including common law)	35	White	C50.8-Overlapping lesion of breast	Well differentiated; Grade I	Left - origin of primary	IIIB	IIIB	Blank(s)	Blank(s)	T4d	N1a	M0	T4d	N1a	M0	RE+RN	RE+RN	Regional	50	Unknown or not applicable	None; diagnosed at autopsy	Surgery performed	100	750	250	0	10	10	1	987	987	0	110	20	Blank(s)	988	5	6	0	15	1	Blank(s)	No	No	No	No	Alive	Alive or dead of other cause
41478798	Married (including common law)	34	White	C50.9-Breast, NOS	Poorly differentiated; Grade III	Right - origin of primary	IV	IV	Blank(s)	Blank(s)	T4d	N1	M1	T4d	N1	M1	D	D	Distant	63	Unknown or not applicable	None; diagnosed at autopsy	Surgery performed	998	750	255	50	20	20	0	987	987	20	999	10	Blank(s)	988	5	5	0	8	0	Blank(s)	Yes	No	No	No	Alive	Alive or dead of other cause
69974591	Single (never married)	33	Black	C50.5-Lower-outer quadrant of breast	Unknown	Left - origin of primary	IIIB	IIIB	Blank(s)	Blank(s)	T4d	N1	M0	T4d	N1	M0	RE+RN	RE+RN	Regional	75	Unknown or not applicable	None; diagnosed at autopsy	Surgery performed	50	750	255	0	10	10	95	987	987	987	999	10	Blank(s)	988	5	5	0	16	0	Blank(s)	No	No	No	No	Alive	Alive or dead of other cause
98088439	Married (including common law)	31	Black	C50.9-Breast, NOS	Poorly differentiated; Grade III	Left - origin of primary	IIIB	IIIB	Blank(s)	Blank(s)	T4d	N2NOS	M0	T4d	N2NOS	M0	RE+RN	RE+RN	Regional	52	Unknown or not applicable	None; diagnosed at autopsy	Surgery performed	999	750	610	0	20	20	0	987	987	987	999	20	Blank(s)	988	5	5	0	8	0	Blank(s)	No	No	No	No	Breast	Dead (attributable to this cancer dx)
22130975	Married (including common law)	30	Other (American Indian/AK Native, Asian/Pacific Islander)	C50.9-Breast, NOS	Poorly differentiated; Grade III	Left - origin of primary	IV	IV	Blank(s)	Blank(s)	T4d	N1	M1	T4d	N1	M1	D	D	Distant	51	Unknown or not applicable	None; diagnosed at autopsy	Surgery performed	998	750	255	50	10	10	95	987	987	0	130	10	Blank(s)	988	1	1	0	95	95	Blank(s)	Yes	No	Yes	Yes	Alive	Alive or dead of other cause
35231432	Married (including common law)	31	White	C50.8-Overlapping lesion of breast	Poorly differentiated; Grade III	Left - origin of primary	IIIB	IIIB	Blank(s)	Blank(s)	T4d	N1	M0	T4d	N1	M0	RE+RN	RE+RN	Regional	59	Unknown or not applicable	None; diagnosed at autopsy	Surgery performed	999	750	600	0	10	10	1	987	987	60	90	10	Blank(s)	988	6	5	0	13	1	Blank(s)	No	No	No	No	Alive	Alive or dead of other cause
29731892	Married (including common law)	34	Other (American Indian/AK Native, Asian/Pacific Islander)	C50.4-Upper-outer quadrant of breast	Poorly differentiated; Grade III	Right - origin of primary	IIIB	IIIB	Blank(s)	Blank(s)	T4d	N1mi	M0	T4d	N1mi	M0	RE+RN	RE+RN	Regional	52	Unknown or not applicable	None; diagnosed at autopsy	Surgery performed	80	750	155	0	20	10	1	987	987	0	90	10	Blank(s)	988	5	3	0	5	1	Blank(s)	No	No	No	No	Alive	Alive or dead of other cause
71345816	Single (never married)	32	White	C50.8-Overlapping lesion of breast	Poorly differentiated; Grade III	Right - origin of primary	IIIC	IIIC	Blank(s)	Blank(s)	T4d	N3a	M0	T4d	N3a	M0	D	RE+RN	Regional	63	Unknown or not applicable	None; diagnosed at autopsy	Surgery performed	100	750	755	0	20	20	21	987	987	20	90	20	Blank(s)	988	6	6	0	22	21	Blank(s)	No	No	No	No	Breast	Dead (attributable to this cancer dx)
12952579	Single (never married)	30	White	C50.8-Overlapping lesion of breast	Unknown	Left - origin of primary	IIIB	IIIB	Blank(s)	Blank(s)	T4d	N1a	M0	T4d	N1a	M0	RE+RN	RE+RN	Regional	58	Unknown or not applicable	Non-primary surgical procedure to other regional sites	Surgery performed	150	750	600	0	10	20	1	987	987	20	70	20	Blank(s)	988	6	3	0	1	1	Blank(s)	No	No	No	No	Alive	Alive or dead of other cause
77121955	Married (including common law)	30	White	C50.4-Upper-outer quadrant of breast	Poorly differentiated; Grade III	Left - origin of primary	IIIC	IIIC	Blank(s)	Blank(s)	T4d	N3b	M0	T4d	N3b	M0	RE+RN	RE+RN	Regional	52	Unknown or not applicable	None; diagnosed at autopsy	Surgery performed	994	750	763	0	10	20	98	987	987	20	90	10	Blank(s)	988	5	5	0	11	0	Blank(s)	No	No	No	No	Alive	Alive or dead of other cause
44192114	Unmarried or Domestic Partner	28	White	C50.9-Breast, NOS	Poorly differentiated; Grade III	Right - origin of primary	IIIB	IIIB	Blank(s)	Blank(s)	T4d	N2a	M0	T4d	N2a	M0	RE+RN	RE+RN	Regional	52	Unknown or not applicable	None; diagnosed at autopsy	Surgery performed	130	750	510	0	10	20	1	987	987	0	80	20	Blank(s)	988	5	5	0	2	1	Blank(s)	No	No	No	No	Alive	Alive or dead of other cause
52007847	Single (never married)	26	White	C50.8-Overlapping lesion of breast	Poorly differentiated; Grade III	Left - origin of primary	IIIC	IIIC	Blank(s)	Blank(s)	T4d	N3a	M0	T4d	N3a	M0	RE+RN	RE+RN	Regional	51	Unknown or not applicable	None; diagnosed at autopsy	Surgery performed	120	750	250	0	20	20	21	987	987	0	80	10	Blank(s)	988	3	3	0	31	21	Blank(s)	No	No	No	No	Breast	Dead (attributable to this cancer dx)
29709031	Single (never married)	29	Other (American Indian/AK Native, Asian/Pacific Islander)	C50.2-Upper-inner quadrant of breast	Moderately differentiated; Grade II	Left - origin of primary	IIIB	IIIB	Blank(s)	Blank(s)	T4d	N1NOS	M0	T4d	N1NOS	M0	RE+RN	RE+RN	Regional	48	Unknown or not applicable	None; diagnosed at autopsy	Surgery performed	28	750	258	0	20	10	1	987	987	0	60	10	Blank(s)	988	5	3	0	6	1	Blank(s)	No	No	No	No	Alive	Alive or dead of other cause
70157960	Single (never married)	27	White	C50.9-Breast, NOS	Poorly differentiated; Grade III	Left - origin of primary	IIIB	IIIB	Blank(s)	Blank(s)	T4d	N1	M0	T4d	N1	M0	RE+RN	RE+RN	Regional	52	Unknown or not applicable	None; diagnosed at autopsy	Surgery performed	998	750	260	0	10	20	98	987	987	0	999	10	Blank(s)	988	1	1	0	0	98	Blank(s)	No	No	No	No	Alive	Alive or dead of other cause
51952866	Married (including common law)	22	White	C50.9-Breast, NOS	Poorly differentiated; Grade III	Left - origin of primary	IV	IV	Blank(s)	Blank(s)	T4d	N0(i-)	M1	T4d	N0(i-)	M1	D	D	Distant	41	Unknown or not applicable	None; diagnosed at autopsy	Surgery performed	75	750	0	10	20	20	0	1	0	20	80	10	Blank(s)	988	5	6	5	5	0	Blank(s)	No	No	No	No	Breast	Dead (attributable to this cancer dx)
41519943	Single (never married)	25	White	C50.9-Breast, NOS	Poorly differentiated; Grade III	Left - origin of primary	IIIB	IIIB	Blank(s)	Blank(s)	T4d	N1	M0	T4d	N1	M0	RE+RN	RE+RN	Regional	51	Unknown or not applicable	None; diagnosed at autopsy	Surgery performed	83	750	255	0	20	20	1	987	987	50	130	20	Blank(s)	988	5	5	0	26	1	Blank(s)	No	No	No	No	Miscellaneous Malignant Cancer	Dead (attributable to this cancer dx)
[truncated: 11 more columns]
